# Supplementary material for: Calix[4]pyrrole bis-crowns as ion pair receptors: cation selectivity modulated by counter anions
Source: Royal Society of Chemistry journal article supplement (doi:10.1039/d4qo01401d), 2024-01-01
Supplement: d4qo01401d1.pdf [file d4qo01401d1.pdf]

**Supporting information for**  
**Calix[4]pyrrole Bis-crowns as Ion Pair Receptors: Cation Selectivity**  
**Modulated by the Counter Anions**

Ju Ho Yang,<sup>#</sup> Ju Hyun Oh,<sup>#</sup> Seung-Ryong Kwon and Sung Kuk Kim<sup>\*</sup>

*Department of Chemistry and Research Institute of Natural Science, Gyeongsang National University, Jinju, 660-701, Korea*

|                                                             |           |
|-------------------------------------------------------------|-----------|
| 1. General experimental and synthetic details               | S1 – S3   |
| 2. <sup>1</sup> H NMR Spectral data for ion binding studies | S4 – S30  |
| 3. NMR and HRMS spectra                                     | S31 – S43 |
| 4. X-ray crystal data                                       | S44 –     |
| S48                                                         |           |
| 5. References                                               | S45       |

## 1. General experimental and synthetic details

Solvents and reagents used for the synthetic work were purchased from Aldrich, TCI, or Alfa Aesar and used without further purification. NMR spectra were recorded on a Bruker Advance-300 MHz instrument. The NMR spectra were referenced to residual solvent peaks and the spectroscopic solvents were purchased from either Cambridge Isotope Laboratories or Aldrich. Fast atom bombardment (FAB) mass spectra (MS) were recorded on a JMS-700 (JEOL) spectrometer. TLC analyses were carried out using Sorbent Technologies silica gel (200 mm) sheets. Column chromatography was performed on Sorbent silica gel 60 (40–63 mm). Calix[4]pyrrole **5** was synthesized following a literature procedure.<sup>1,2</sup> The X-ray crystallographic analysis was carried out on a Rigaku Oxford Diffraction HyPix6000E Synergy diffractometer using a  $\mu$ -focus Cu K $\alpha$  radiation source ( $\lambda = 1.5418 \text{ \AA}$ ) with collimating mirror monochromators.

## Compound 2

To acetonitrile (100 mL) were added calix[4]pyrrole **6** (1.00 g, 1.34 mmol) and triethylene glycol ditosylates (1.23 g, 2.68 mmol) in the presence of 12 equiv of  $K_2CO_3$  (2.23 g). The reaction mixture was stirred under a nitrogen atmosphere for 3 days at reflux. After the reaction was completed, the volatile solvent was removed by evaporation *in vacuo*. To the resulting crude reaction mixture, ethyl acetate was added and the organic layer was washed twice with water. The organic layer was separated off and then dried over anhydrous  $MgSO_4$ . The organic solvent was evaporated in *vacuo* to give a brownish solid. Column chromatography over neutral alumina (eluent: ethyl acetate/hexane (1:1)) gave receptor **2** (0.13 g, 10% yield) as a white solid.  $^1H$  NMR (300 MHz,  $CDCl_3$ )  $\delta$  7.17 (s, 2H), 7.04 (s, 2H), 6.89 – 6.79 (m, 8H), 6.73 – 6.63 (m, 8H), 6.09 (d,  $J$  = 2.5 Hz, 4H), 6.00 (d,  $J$  = 2.6 Hz, 4H), 4.10 – 4.00 (m, 8H), 3.93 – 3.78 (m, 8H), 3.74 (s, 8H), 1.90 (s, 12H).  $^{13}C$  NMR (75 MHz, chloroform-*d*)  $\delta$  157.1, 137.3, 136.6, 128.4, 113.7, 106.1, 105.2, 71.1, 69.7, 67.4, 44.0, 30.1 ppm. HRMS (FAB)  $m/z$  969.4825  $[M + H^+]$  calc. for  $C_{60}H_{65}N_4O_8$ , found 969.4802.

## Compound 3

To acetonitrile (100 mL) were added calix[4]pyrrole **6** (1.00 g, 1.34 mmol) and tetraethylene glycol ditosylates (1.42 g, 2.82 mmol) in the presence of 12 equiv of  $K_2CO_3$  (2.23 g). The reaction mixture was stirred under a nitrogen atmosphere for 3 days at reflux. After the reaction was completed, the volatile solvent was removed by evaporation *in vacuo*. To the resulting crude reaction mixture, ethyl acetate was added, and the organic layer was washed twice with water. The organic layer was separated off and then dried over anhydrous  $MgSO_4$ . The organic solvent was evaporated in *vacuo* to give a brownish solid. Column chromatography over silica gel (eluent: ethyl acetate/hexane (3:2)) gave receptor **3** (0.33 g, 23% yield) as a white solid.  $^1H$  NMR (300 MHz,  $CDCl_3$ )  $\delta$  7.59 (s, 2H), 7.34 (s, 2H), 6.83 (d,  $J$  = 8.7 Hz, 8H), 6.64 (d,  $J$  = 8.6 Hz, 8H), 6.02 (d,  $J$  = 2.5 Hz, 4H), 5.67 (s, 4H), 4.09 – 3.95 (m, 8H), 3.79 (t,  $J$  = 4.9 Hz, 8H), 3.70 – 3.55 (m, 16H), 1.84 (s, 12H).  $^{13}C$  NMR (75 MHz, chloroform-*d*)  $\delta$  156.1, 136.1, 127.5, 112.6, 104.5, 69.6, 68.4, 66.4, 43.0 ppm. HRMS (FAB)  $m/z$  1057.5326  $[M + H^+]$  calc. for  $C_{64}H_{73}N_4O_{10}$ , found 1057.5327.

## Compound 4

To acetonitrile (100 mL) were added calix[4]pyrrole **6** (1.00 g, 1.34 mmol) and pentaethylene glycol ditosylates (1.47 g, 2.68 mmol) in the presence of 12 equiv of  $K_2CO_3$  (2.23 g). The reaction mixture was stirred under a nitrogen atmosphere for 3 days at reflux. After the reaction was completed, the volatile solvent was removed by evaporation *in vacuo*. To the resulting crude reaction mixture, ethyl acetate was added and the organic layer was washed twice with water. The organic layer was separated off and then dried over anhydrous  $MgSO_4$ . The organic solvent was evaporated in vacuo to give a brownish solid. Column chromatography over neutral alumina (eluent: ethyl acetate/hexane (1:1)) gave receptor **4** (0.22 g, 15% yield) as a white solid.  $^1H$  NMR (300 MHz,  $CDCl_3$ )  $\delta$  7.81 (s, 2H), 7.47 (s, 2H), 7.02 – 6.93 (m, 8H), 6.80 – 6.70 (m, 8H), 6.10 (d,  $J$  = 2.6 Hz, 4H), 5.45 (d,  $J$  = 2.5 Hz, 4H), 4.14 – 4.04 (m, 8H), 3.85 (t,  $J$  = 5.1 Hz, 8H), 3.76 – 3.62 (m, 24H), 1.93 (s, 12H).  $^{13}C$  NMR (75 MHz, chloroform-*d*)  $\delta$  156.1, 136.7, 127.5, 112.5, 104.1, 70.3, 69.0, 68.5, 66.2, 43.0 ppm. HRMS (FAB)  $m/z$  1145.5830 [ $M + H^+$ ] calc. for  $C_{68}H_{81}N_4O_{12}$ , found 1145.5851.

## 2. $^1\text{H}$ NMR spectral data

a) Treatment used where binding between receptors and anions is governed by a binding/release equilibrium that is slow on the NMR time scale:

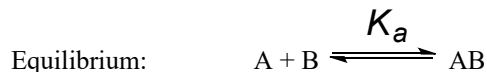

$$\text{Equilibrium constant: } K_a = \frac{[\text{AB}]}{[\text{A}][\text{B}]} = \frac{[\text{AB}]}{(c(\text{A}) - [\text{AB}])(c(\text{B}) - [\text{AB}])} \quad (1)$$

$c(\text{A})$  and  $c(\text{B})$  are the initial concentrations of A and B, and  $[\text{A}]$ ,  $[\text{B}]$  and  $[\text{AB}]$  are the equilibrium concentrations of the three species.

A and B is in slow exchange with the complex AB on the  $^1\text{H}$  NMR time scale.

Two signals for one specific proton on A can be seen in the spectrum, corresponding to complexed and uncomplexed forms of A:

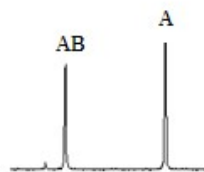

### Single-point Methods

$K_a$  is determined from the integrals of complexed and uncomplexed A. If  $I(\text{A})$  denotes the integral of a signal for one specific proton of A and  $I(\text{AB})$  the integral for the same proton in the complex, the concentration of AB at equilibrium is shown by eq 2. The equilibrium expression is obtained after substituting into eq. (1):

$$[\text{AB}] = \frac{I(\text{AB})}{I(\text{A}) + I(\text{AB})} c(\text{A}) \quad (2)$$

$$K_a = \frac{I(\text{AB})}{I(\text{A})(c(\text{B}) - \frac{I(\text{AB})}{I(\text{A}) + I(\text{AB})} c(\text{A}))} \quad (3)$$

b) Treatment used where binding between receptors and anions is governed by a binding/release equilibrium that is fast on the NMR time scale:

Binding constants of receptors with anions were calculated using the equation

$y = (b \times x)/(1 + x \times Ka)$ , where  $x = [G]$ ,  $y = |\delta_0 - \delta|$  ( $\delta$  is the chemical shift of an indicative receptor proton signal at a certain anion concentration and  $\delta_0$  is the chemical shift of the receptor signal for the anion-free form).

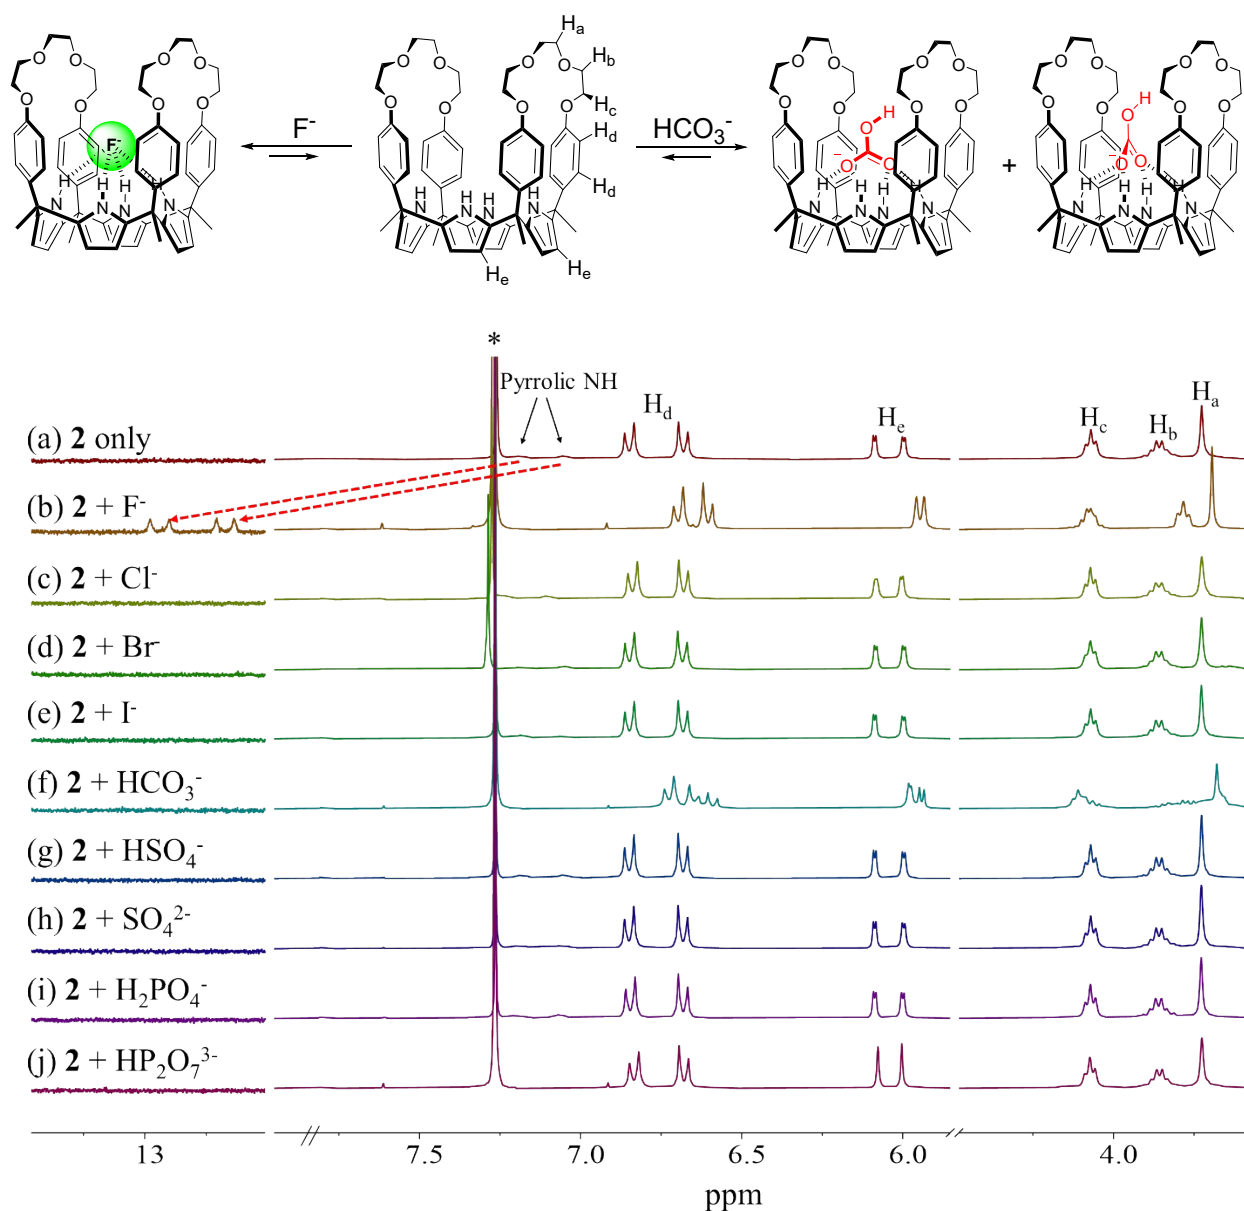

**Fig. S1** Top: Proposed binding modes of receptor **2** for  $F^-$  and  $HCO_3^-$ . Bottom: Partial views of  $^1H$  NMR spectra (300 MHz, 25 °C) of **2** (3 mM) recorded in chloroform-*d* in the presence of the indicated anions (ca. 10 equiv each) as their respective TBA<sup>+</sup> (tetrabutylammonium) salts except for  $HCO_3^-$  in the TEA<sup>+</sup> (tetraethylammonium) salt form. The asterisk (\*) denotes a residual NMR solvent peak. The proton signals exhibited at lower fields than  $\delta = 10$  ppm were magnified by 2-fold.

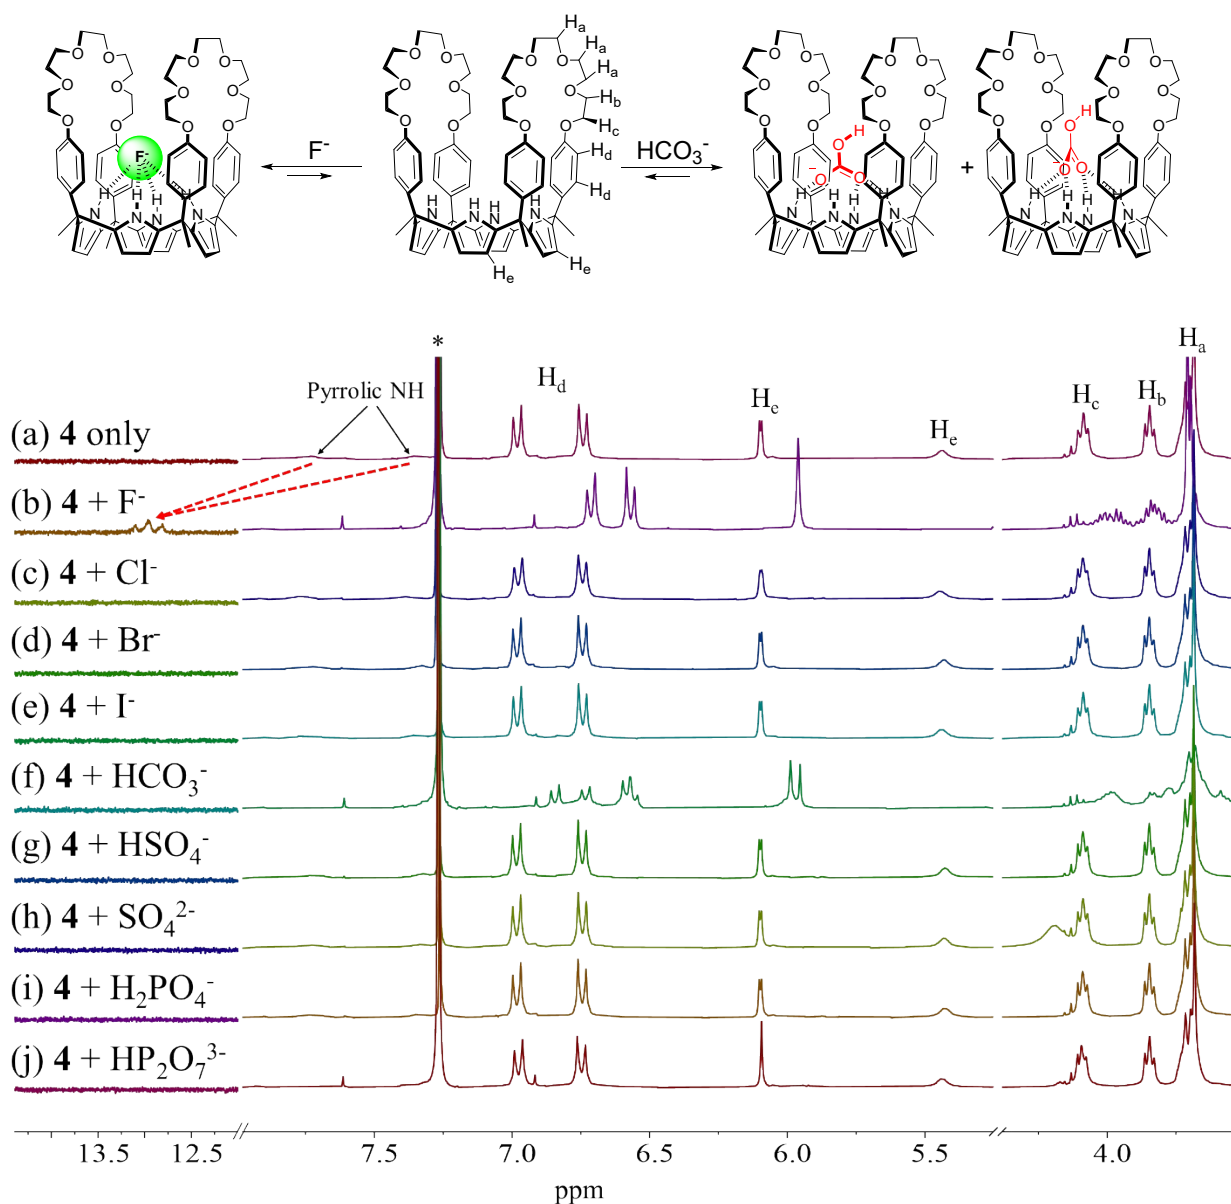

**Fig. S2** Top: Proposed binding modes of receptor **4** for  $F^-$  and  $HCO_3^-$ . Bottom: Partial views of  $^1H$  NMR spectra (300 MHz, 25 °C) of **4** (3 mM) recorded in chloroform-*d* in the presence of the indicated anions (ca. 10 equiv each) as their respective TBA<sup>+</sup> (tetrabutylammonium) salts except for  $HCO_3^-$  in the TEA<sup>+</sup> (tetraethylammonium) salt form. The asterisk (\*) denotes a residual NMR solvent peak. The proton signals exhibited at lower fields than  $\delta = 10$  ppm were magnified by 3-fold.

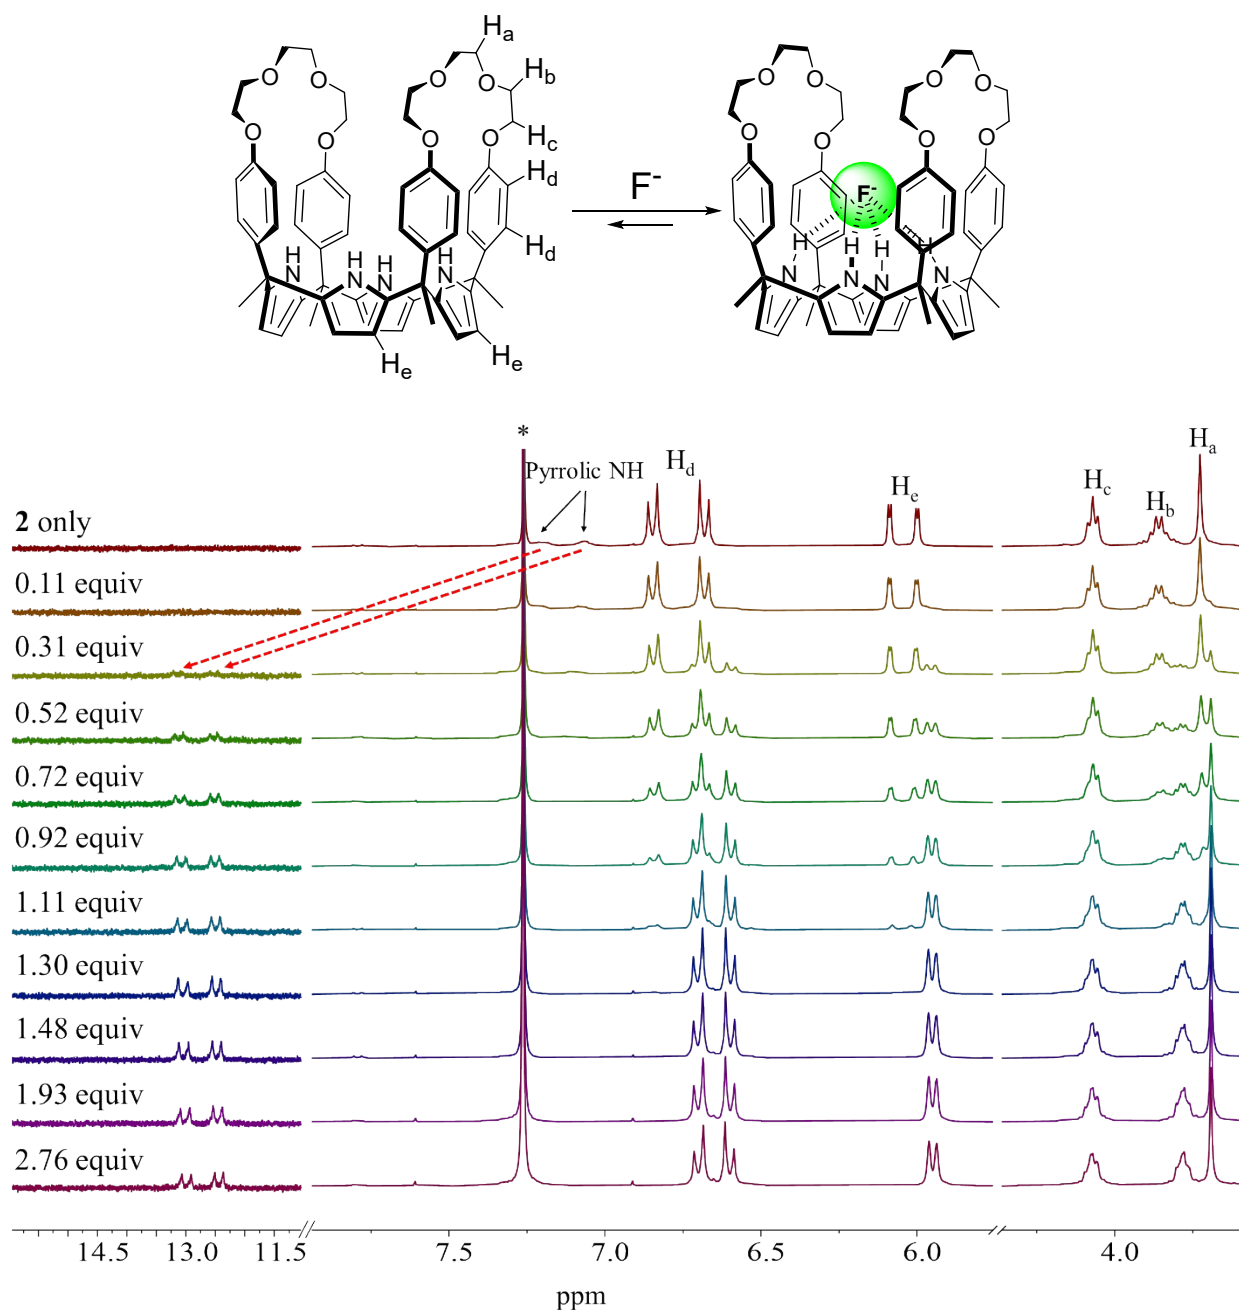

**Fig. S3** Partial  $^1H$  NMR spectra (300 MHz, 25 °C) recorded during the titration of **2** (3 mM) with TBAF in  $CDCl_3$ . The asterisk (\*) denotes a residual NMR solvent peak. The proton signals exhibited at lower fields than  $\delta = 10$  ppm were magnified by 3-fold.

(a) TBAF only

(b) **2** + TBAF

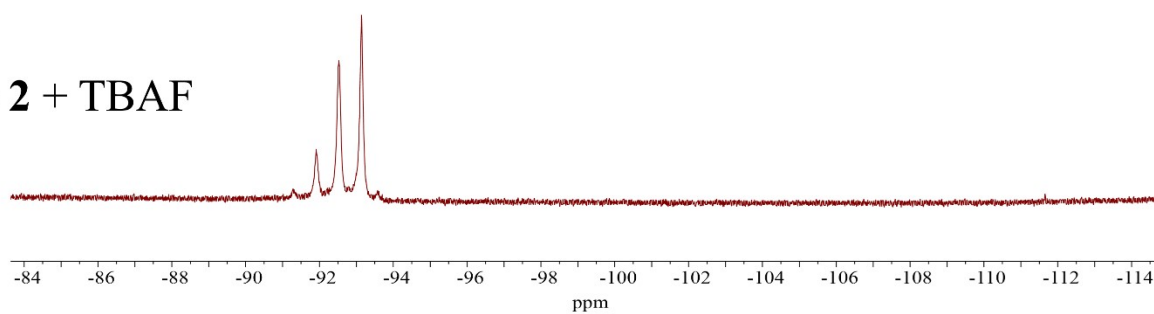

**Fig. S4** Partial  $^{19}\text{F}$  NMR spectra of (a) TBAF only and (b) receptor **2** (10 mM) + TBAF (5 equiv) recorded in  $\text{CDCl}_3$ . Fluorobenzene was used as an internal reference.

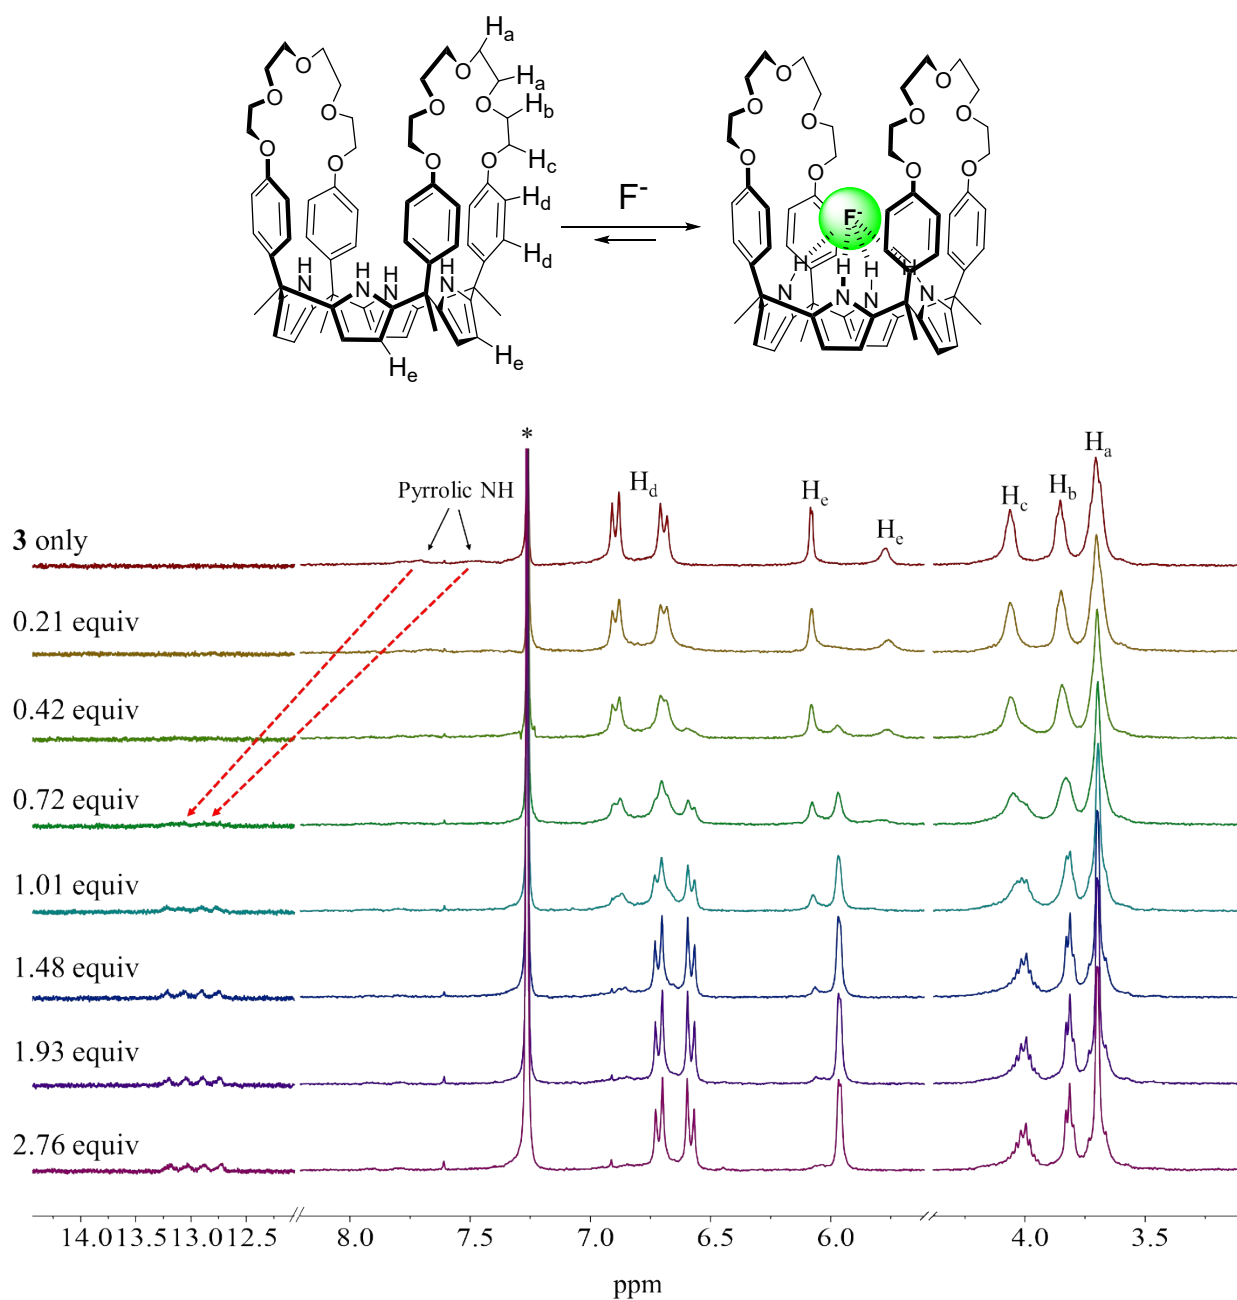

**Fig. S5** Partial  $^1\text{H}$  NMR spectra (300 MHz, 25  $^\circ\text{C}$ ) recorded during the titration of **3** (3 mM) with TBAF in  $\text{CDCl}_3$ . The asterisk (\*) denotes a residual NMR solvent peak. The proton signals exhibited at lower fields than  $\delta = 10$  ppm were magnified by 3-fold.

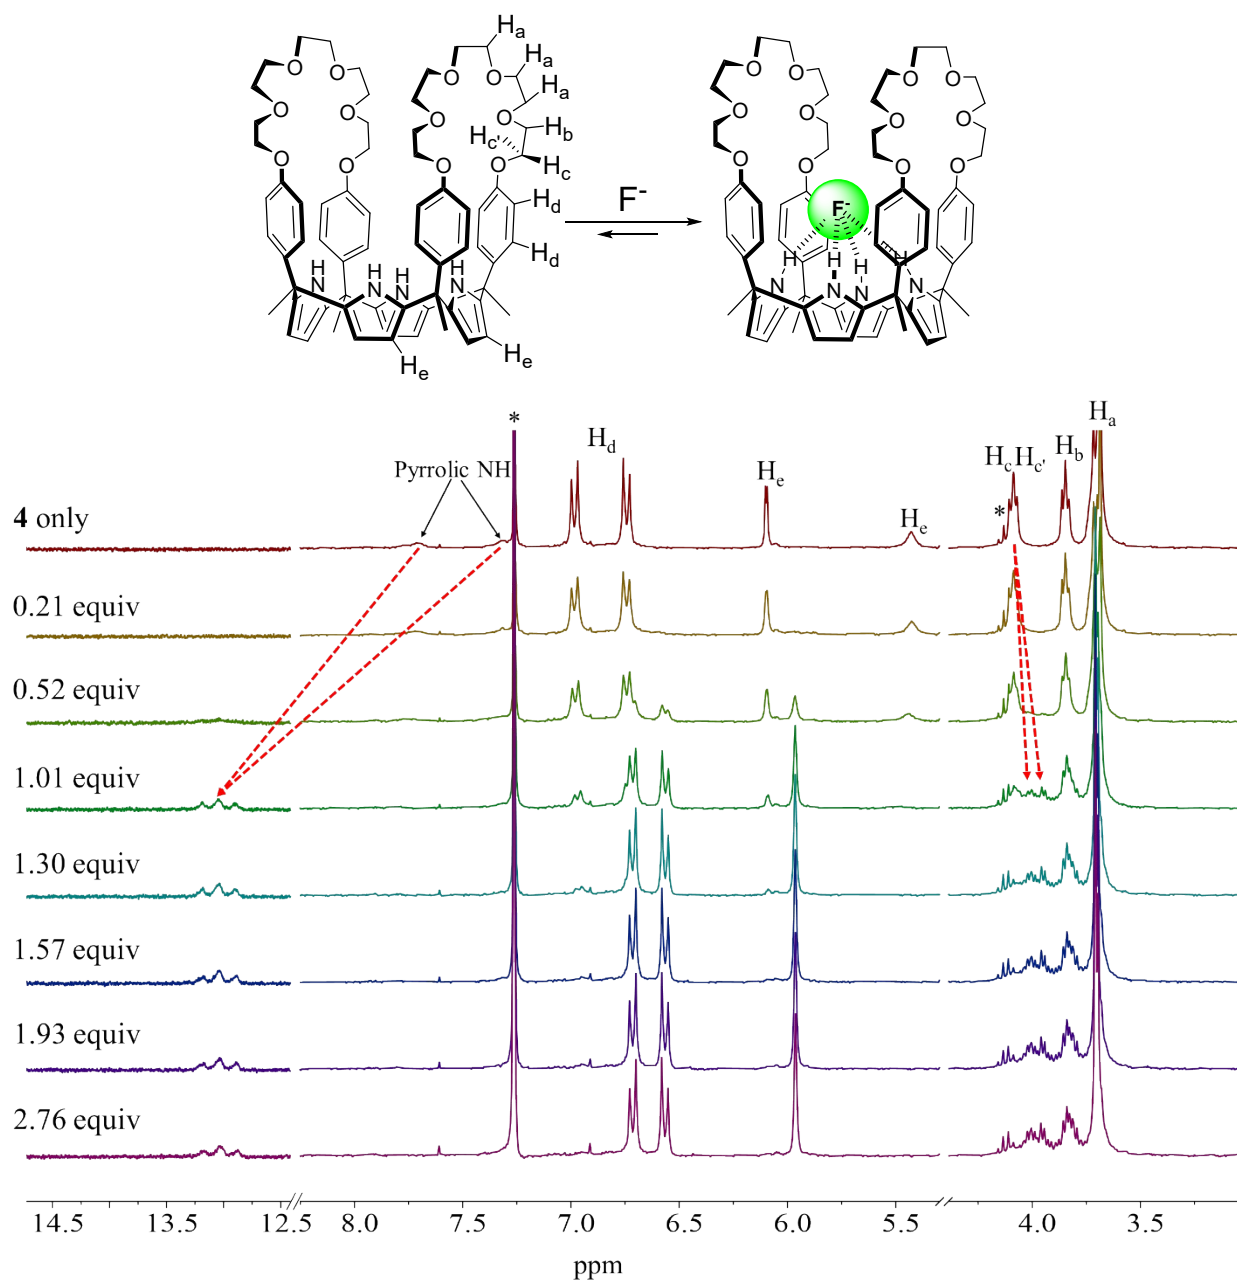

**Fig. S6** Partial  $^1\text{H}$  NMR spectra (300 MHz, 25  $^\circ\text{C}$ ) recorded during the titration of **4** (3 mM) with TBAF in  $\text{CDCl}_3$ . The asterisk (\*) denotes a residual NMR solvent peak. The proton signals exhibited at lower fields than  $\delta = 10$  ppm were magnified by 3-fold.

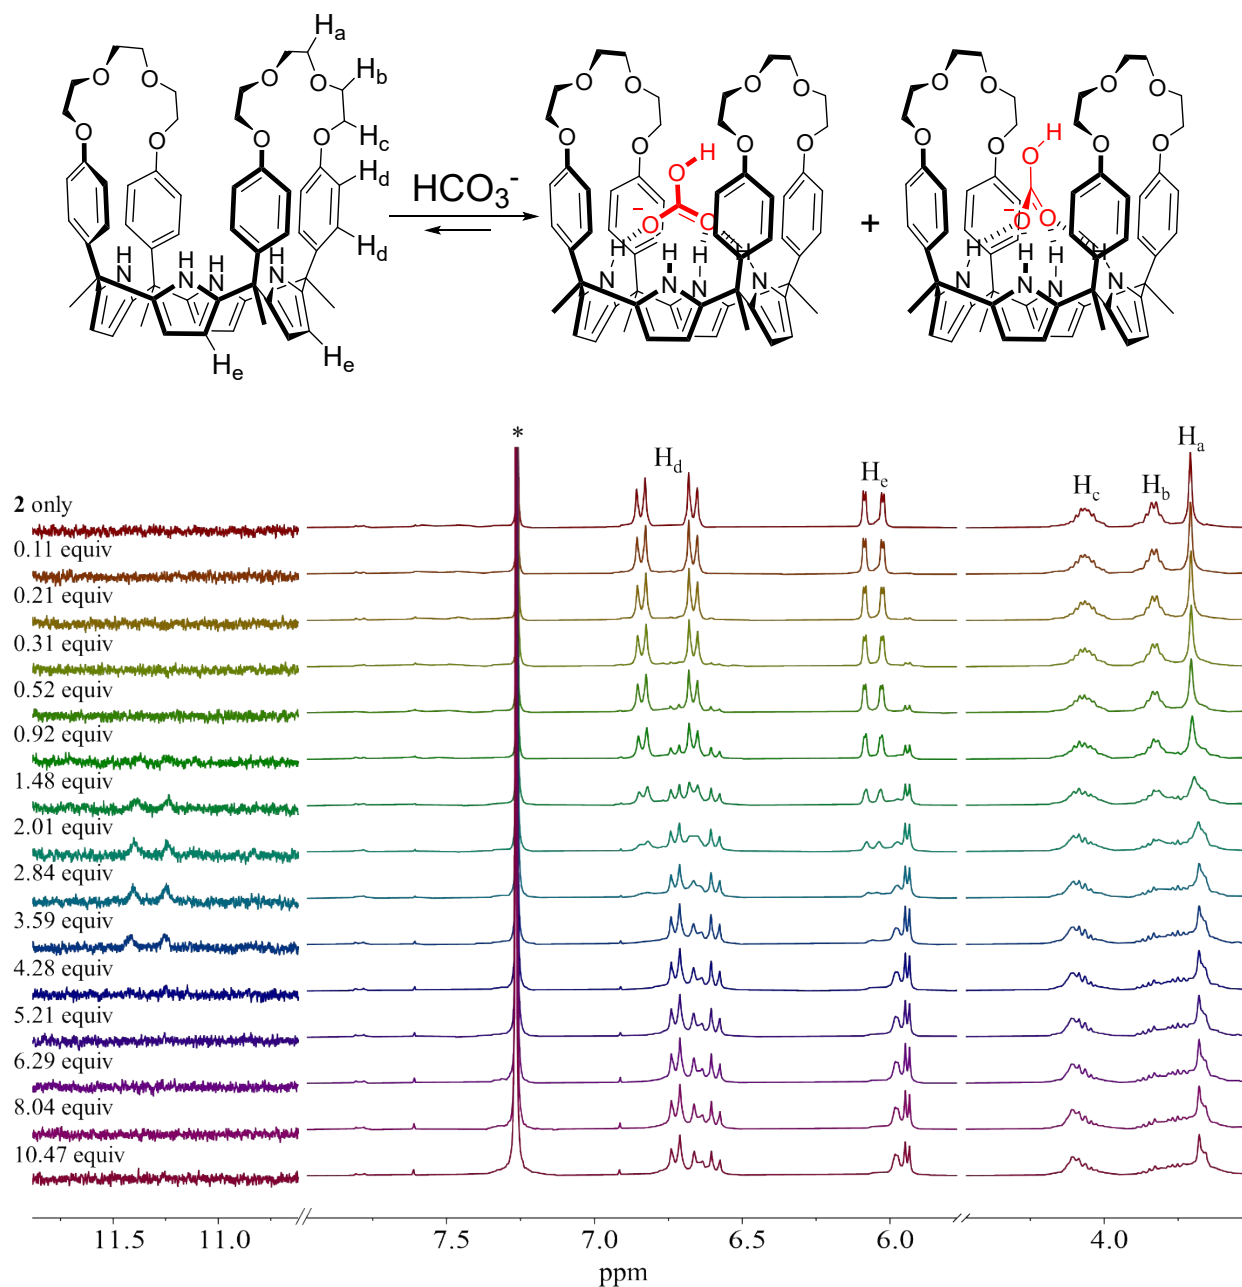

**Fig. S7** Top: Two possible binding modes between receptor **2** and  $\text{HCO}_3^-$ . Bottom: Partial  $^1\text{H}$  NMR spectra (300 MHz, 25 °C) recorded during the titration of **2** (3 mM) with  $\text{TEAHCO}_3$  in  $\text{CDCl}_3$ . The asterisk (\*) denotes a residual NMR solvent peak. The proton signals exhibited at lower fields than  $\delta = 10$  ppm were magnified by 5-fold.

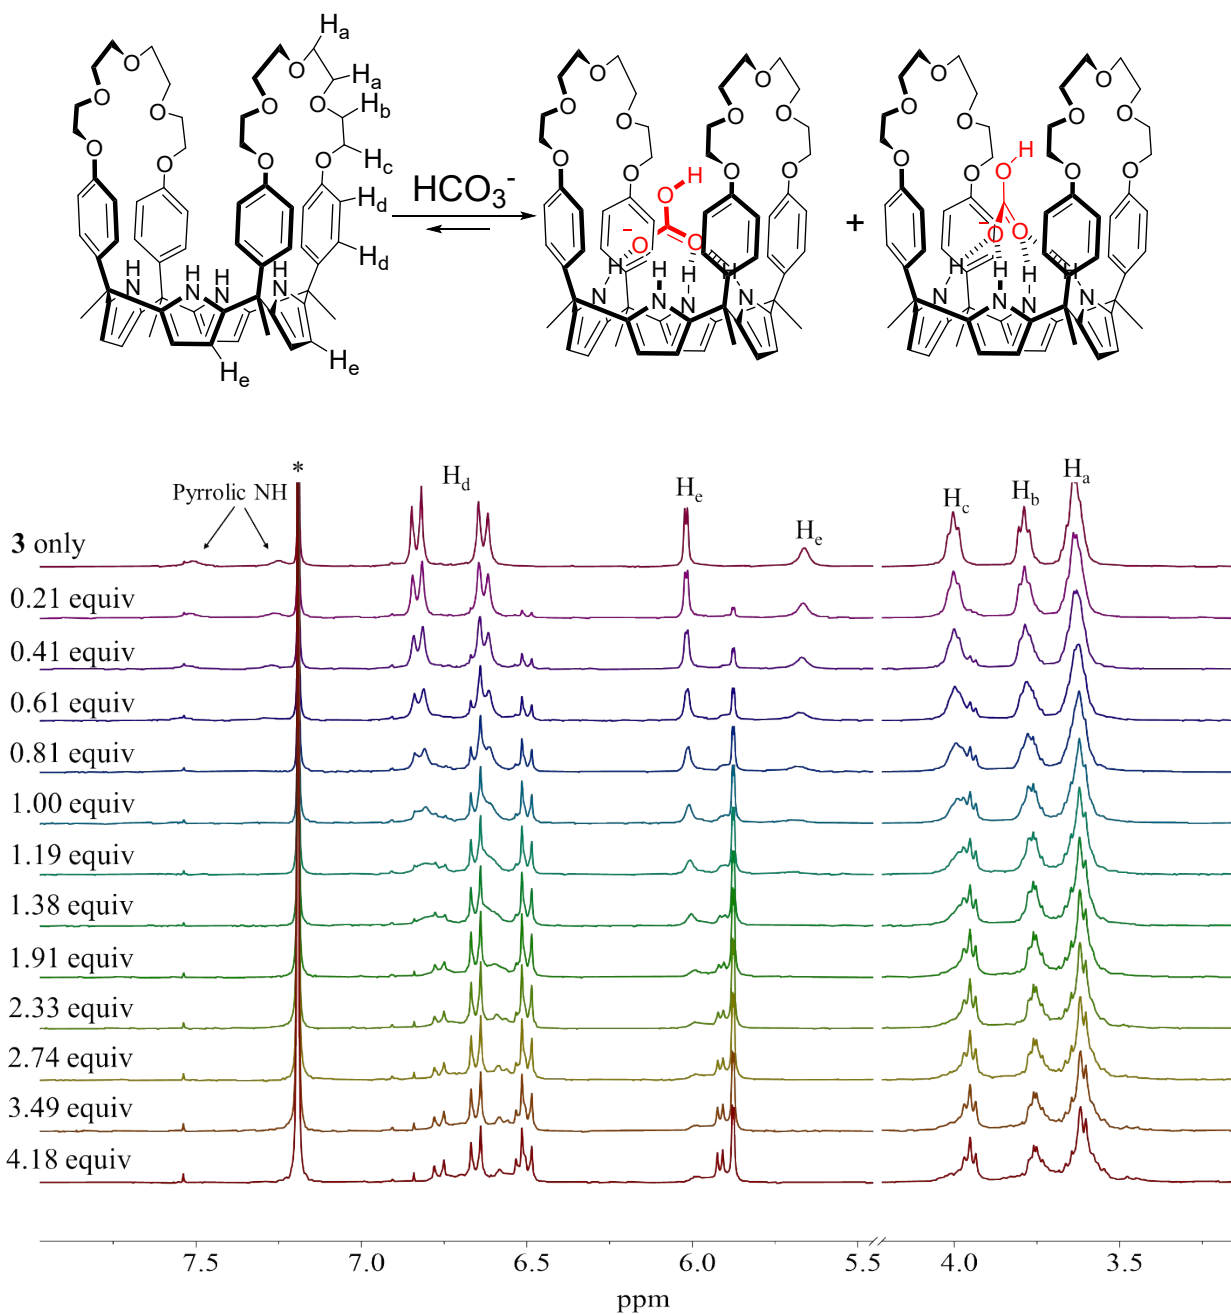

**Fig. S8** Top: Two possible binding modes between receptor **3** and  $\text{HCO}_3^-$ . Bottom: Partial  $^1\text{H}$  NMR spectra (300 MHz, 25 °C) recorded during the titration of **3** (3 mM) with  $\text{TEAHCO}_3$  in  $\text{CDCl}_3$ . The asterisk (\*) denotes a residual NMR solvent peak.

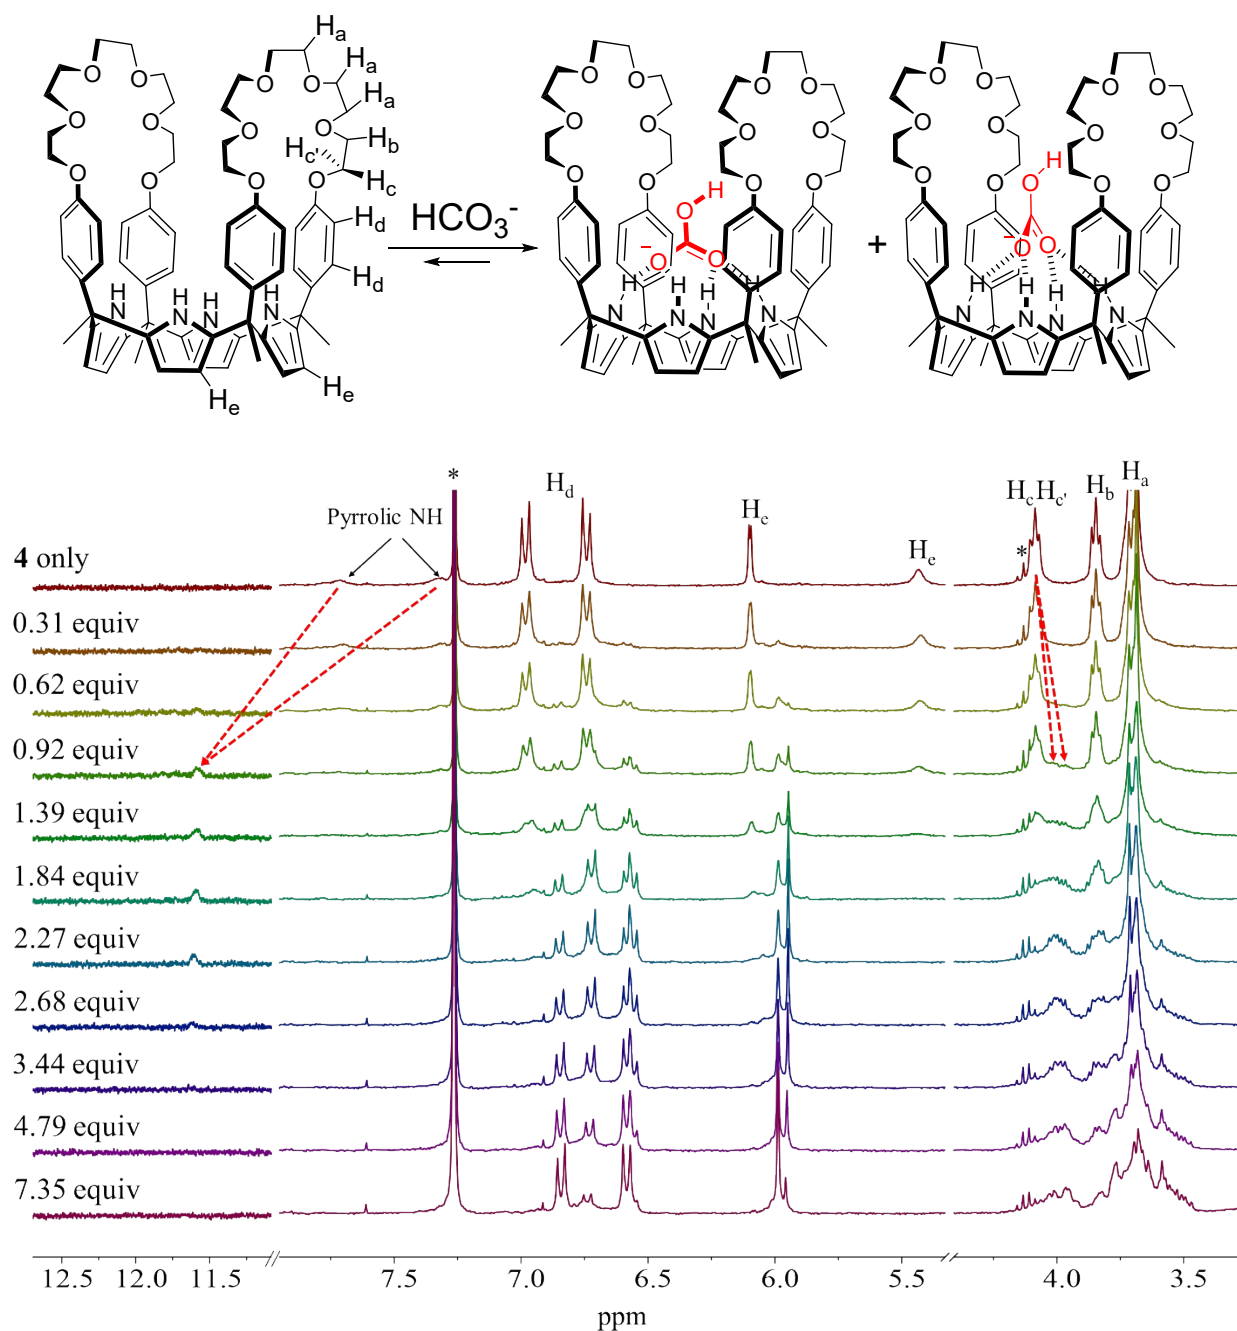

**Fig. S9** Top: Two possible binding modes between receptor **4** and  $\text{HCO}_3^-$ . Bottom: Partial  $^1\text{H}$  NMR spectra (300 MHz, 25 °C) recorded during the titration of **4** (3 mM) with TEAHCO<sub>3</sub> in CDCl<sub>3</sub>. The asterisk (\*) denotes a residual NMR solvent peak.

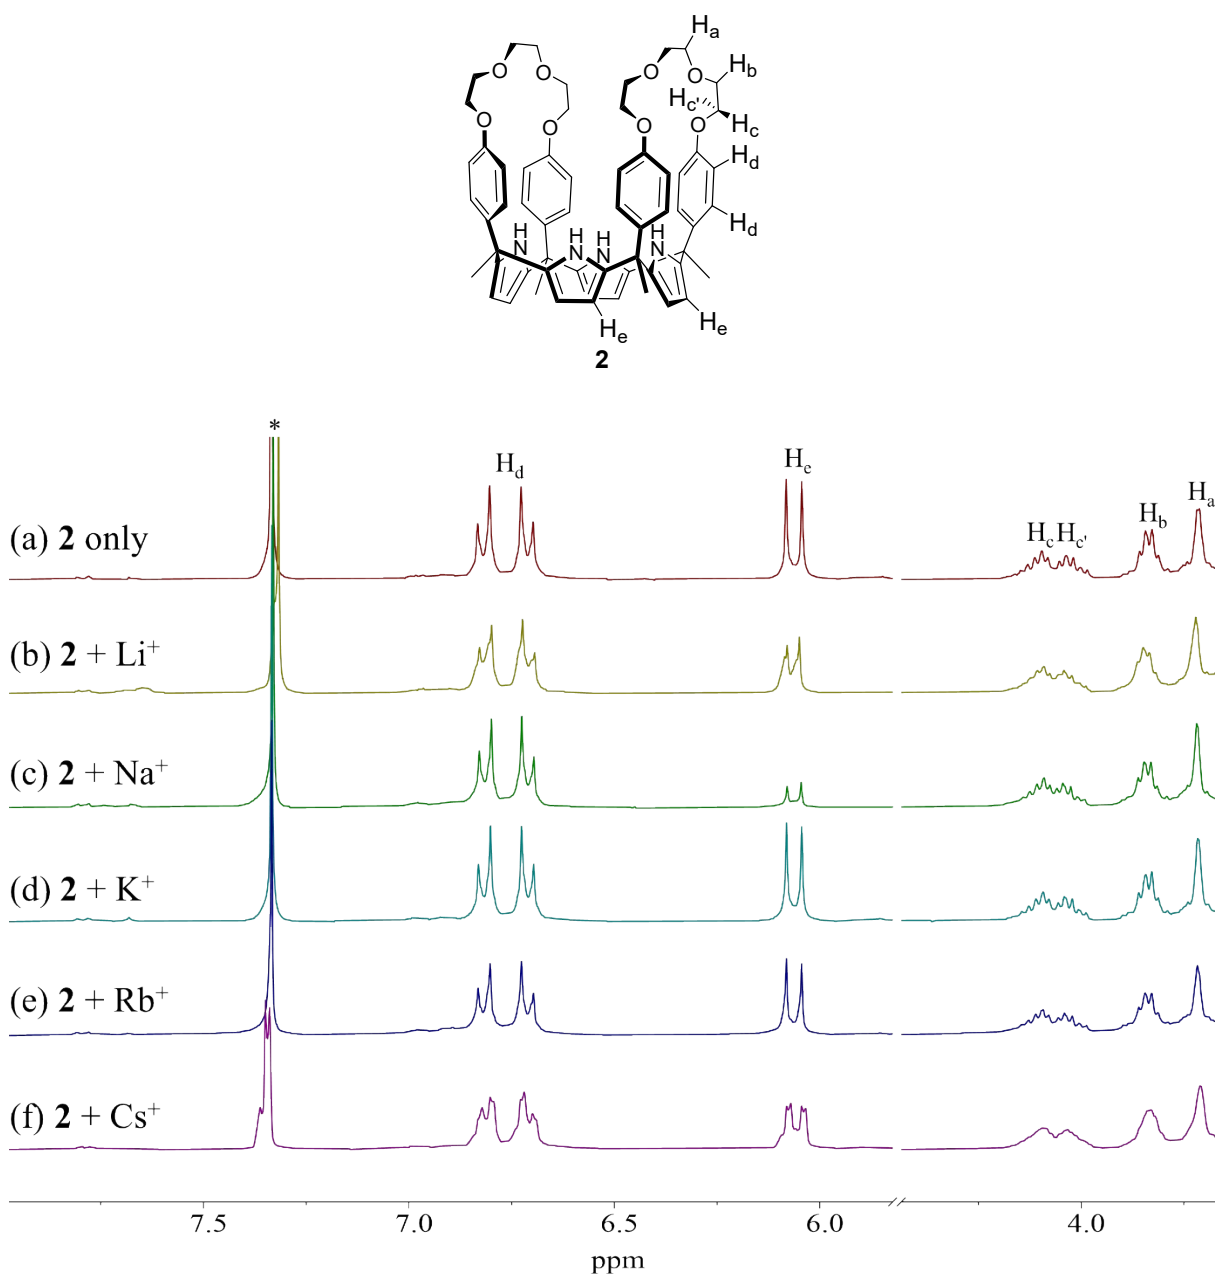

**Fig. S10** Partial <sup>1</sup>H NMR spectra (300 MHz, 25 °C) of receptor **2** (3 mM) recorded in 10% CD<sub>3</sub>OD in CDCl<sub>3</sub> in the presence of an excess of the indicated alkali metal cations as their respective perchlorate (ClO<sub>4</sub><sup>-</sup>) salts. The asterisk (\*) denotes a residual NMR solvent peak.

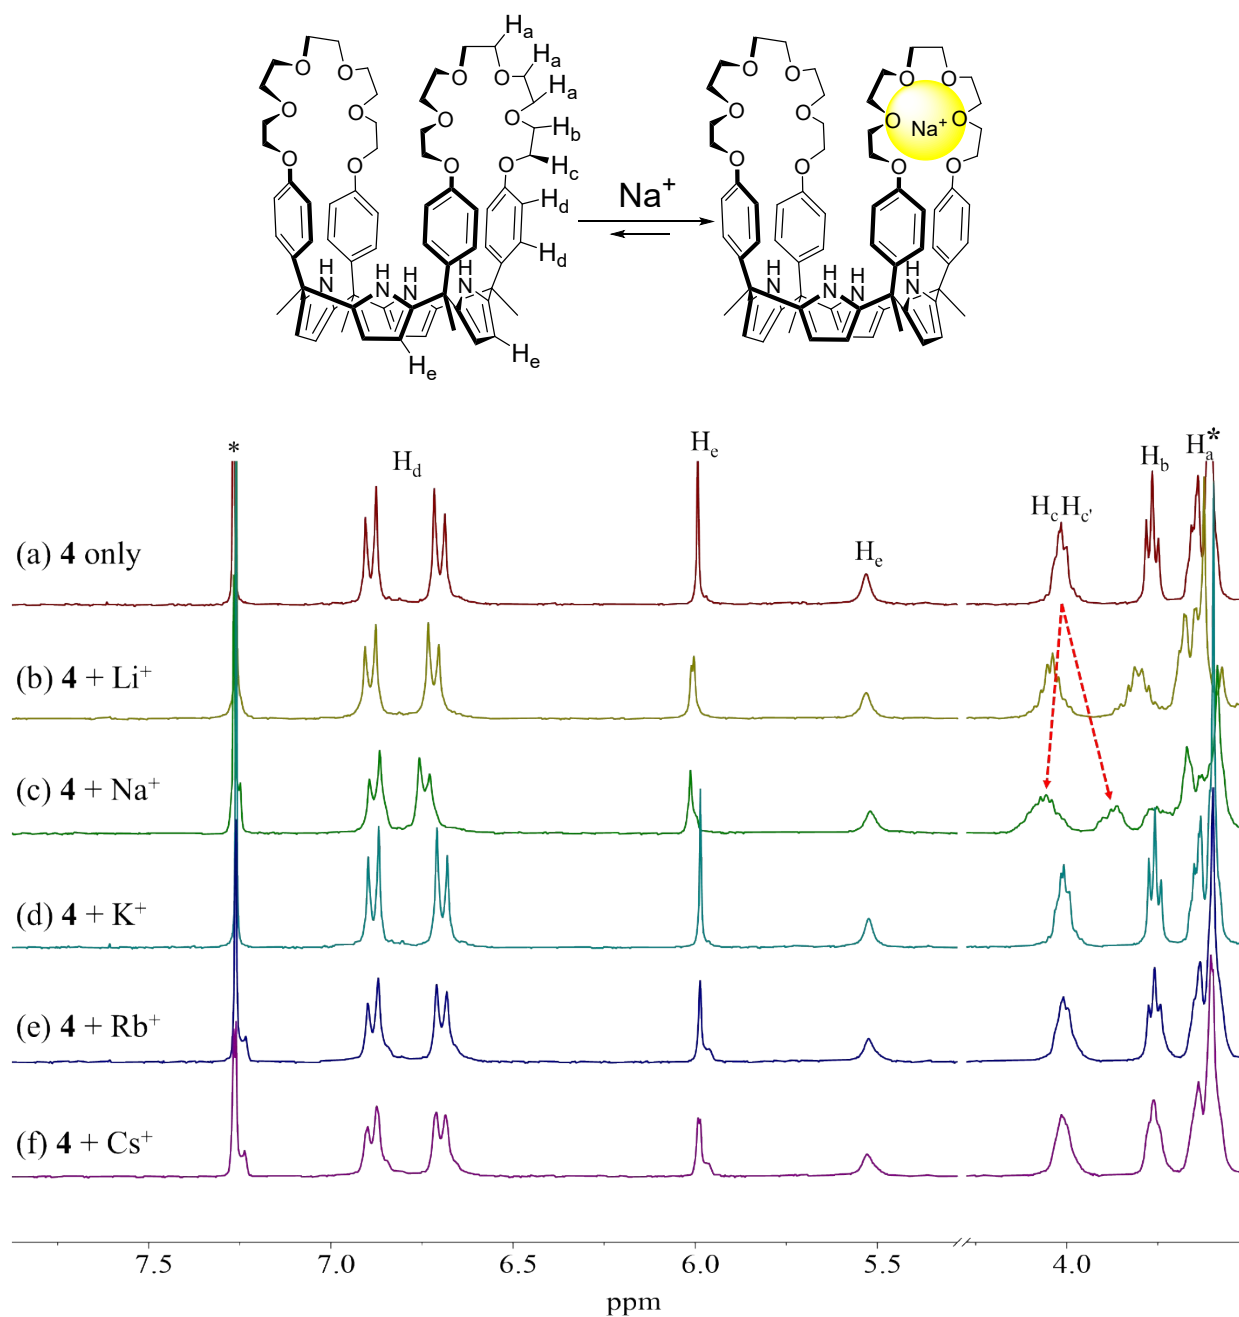

**Fig. S11** Top: Proposed binding mode of receptor **4** for  $\text{Na}^+$ . Bottom: Partial  $^1\text{H}$  NMR spectra (300 MHz, 25 °C) of receptor **4** (3 mM) recorded in 10%  $\text{CD}_3\text{OD}$  in  $\text{CDCl}_3$  in the presence of an excess of the indicated alkali metal cations as their respective perchlorate ( $\text{ClO}_4^-$ ) salts. The asterisk (\*) denotes a residual NMR solvent peak.

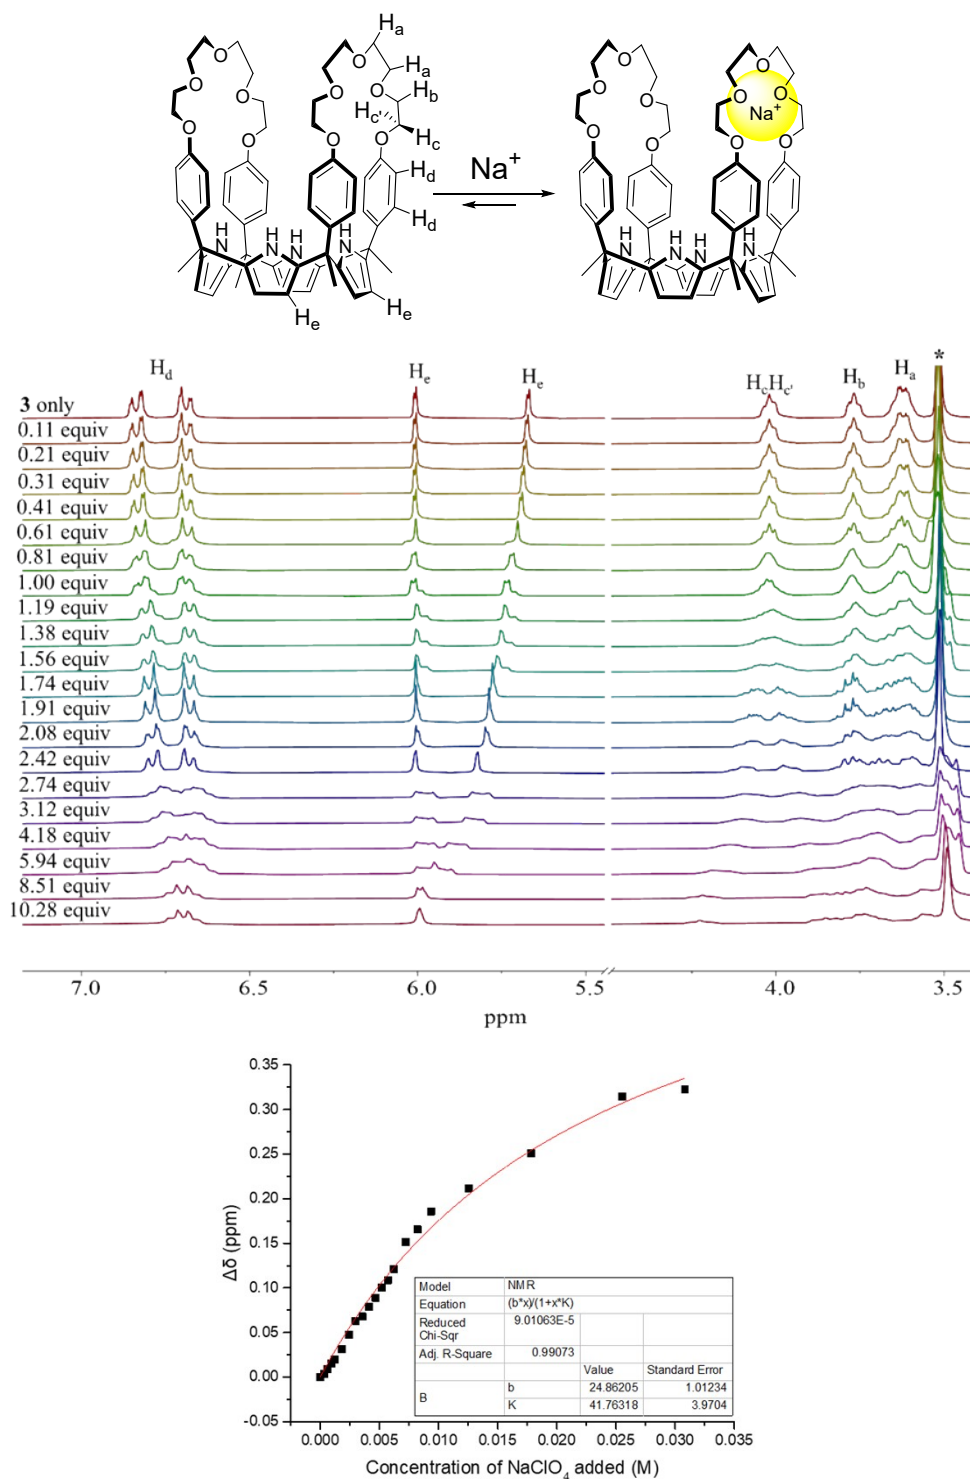

**Fig. S12** Partial  $^1\text{H}$  NMR spectra (300 MHz, 25 °C) recorded during the titration of **3** (3 mM) with  $\text{NaClO}_4$  in  $\text{CDCl}_3:\text{MeOD}$  (9:1, v/v) and the resulting binding isotherm. The asterisk (\*) denotes a residual NMR solvent peak.

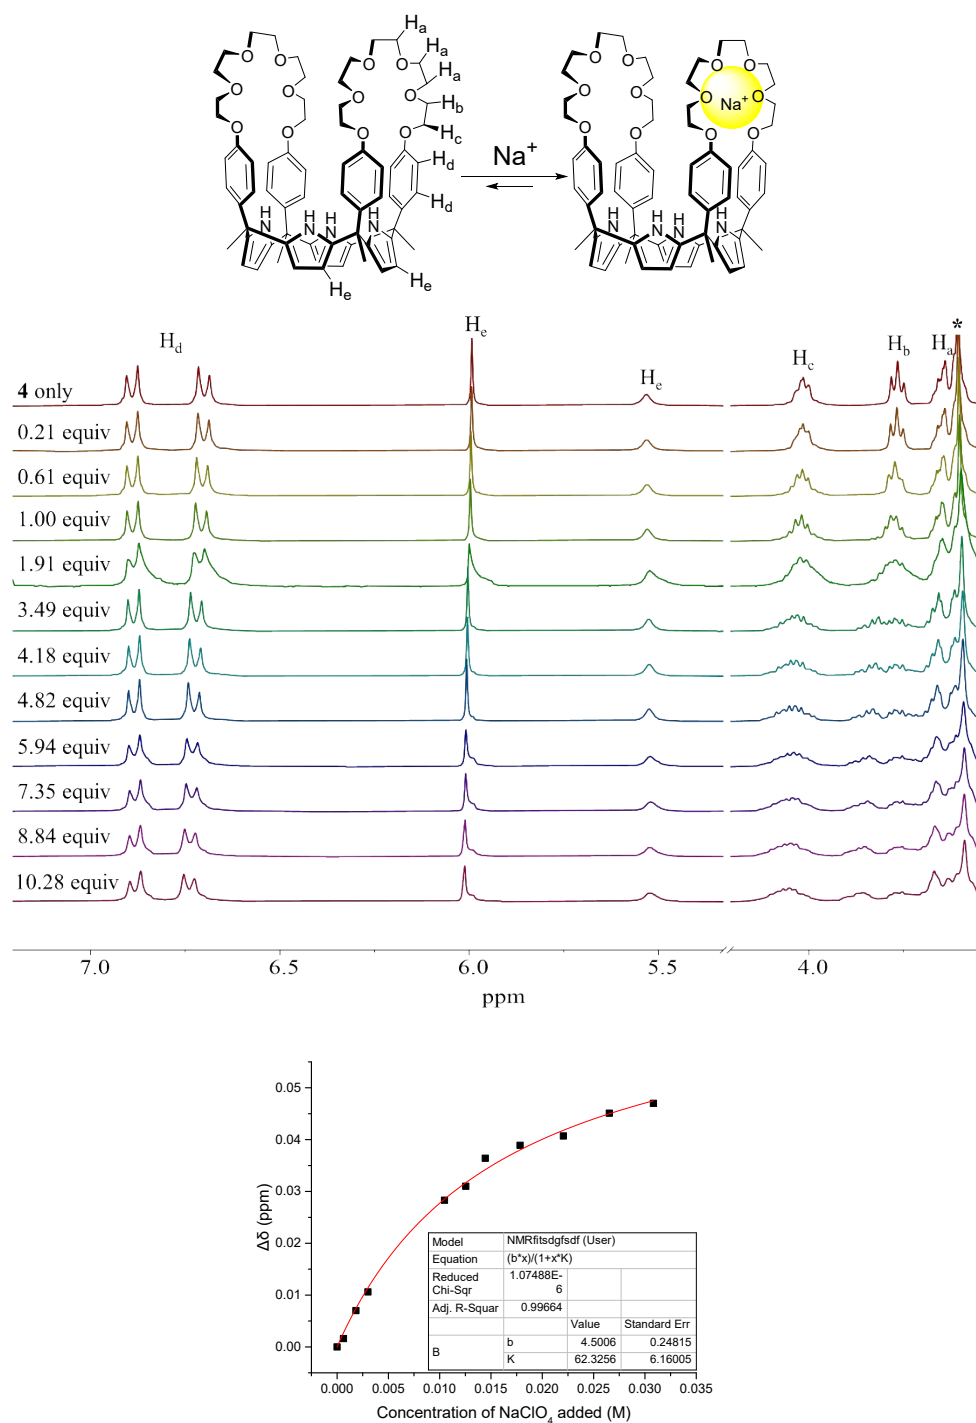

**Fig. S13** Partial  $^1H$  NMR spectra (300 MHz, 25 °C) recorded during the titration of **4** (3 mM) with  $NaClO_4$  in  $CDCl_3:MeOD$  (9:1, v/v) and the resulting binding isotherm. The asterisk (\*) denotes a residual NMR solvent peak.

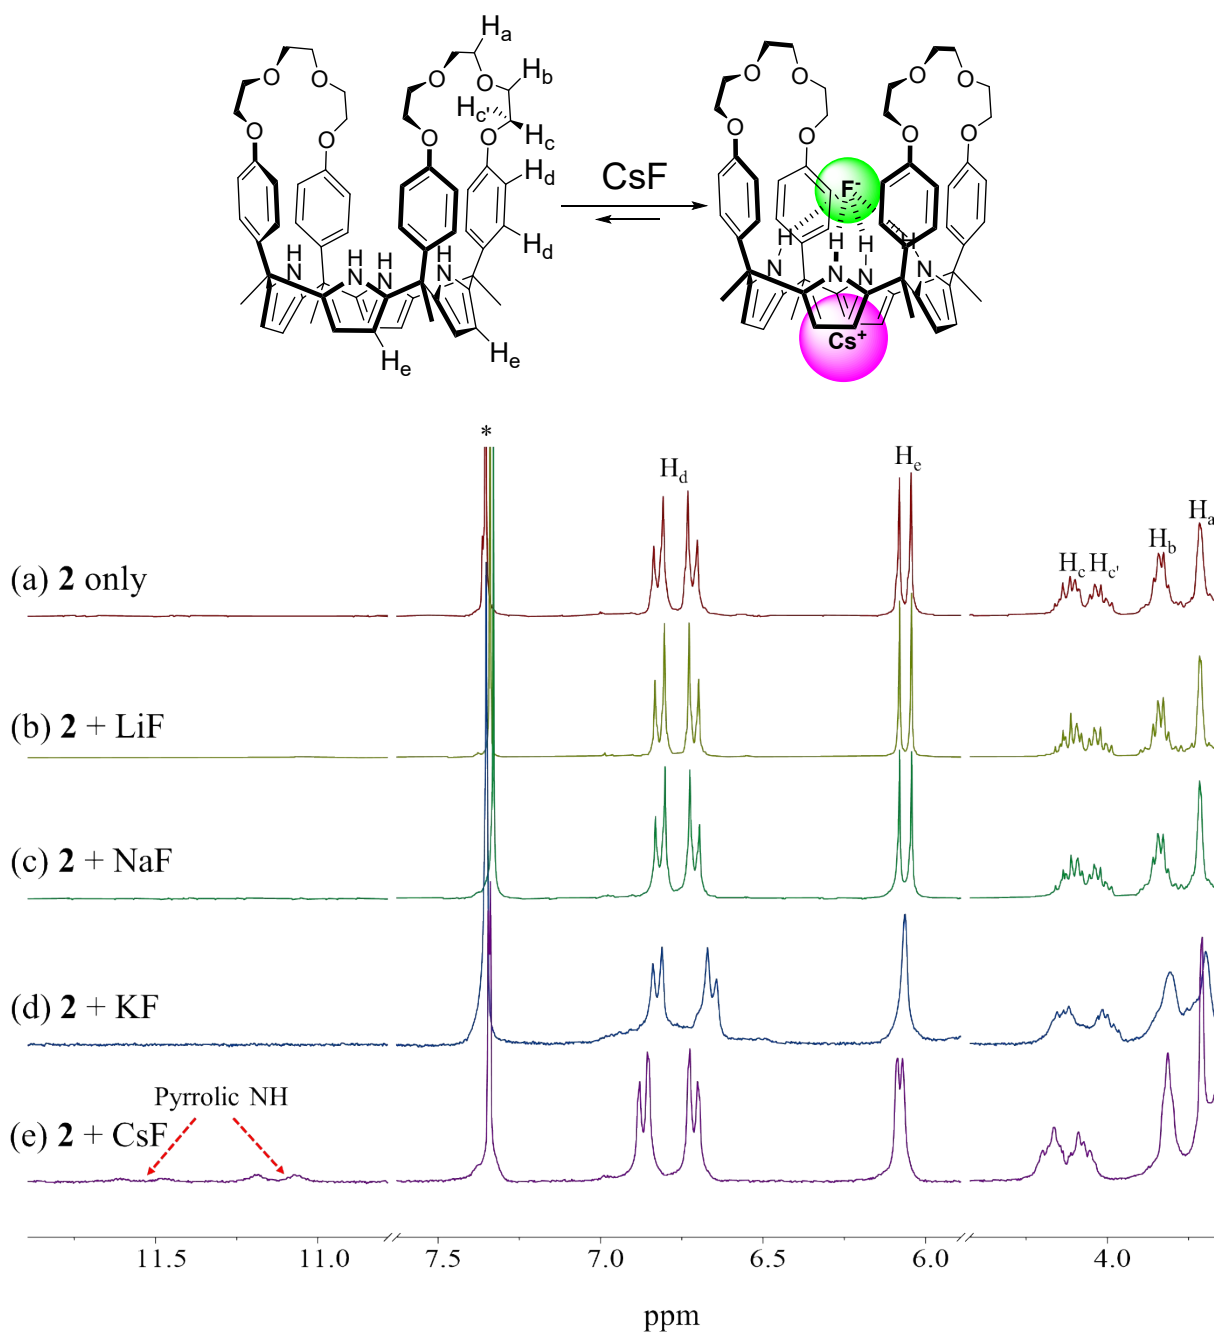

**Fig. S14** Top: Putative binding mode of receptor **2** for CsF. Bottom: Partial  $^1\text{H}$  NMR spectra (300 MHz, 25 °C) of receptor **2** (3 mM) recorded in 10%  $\text{CD}_3\text{OD}$  in  $\text{CDCl}_3$  in the presence of an excess of the indicated alkali metal fluoride salts. The asterisk (\*) denotes a residual NMR solvent peak.

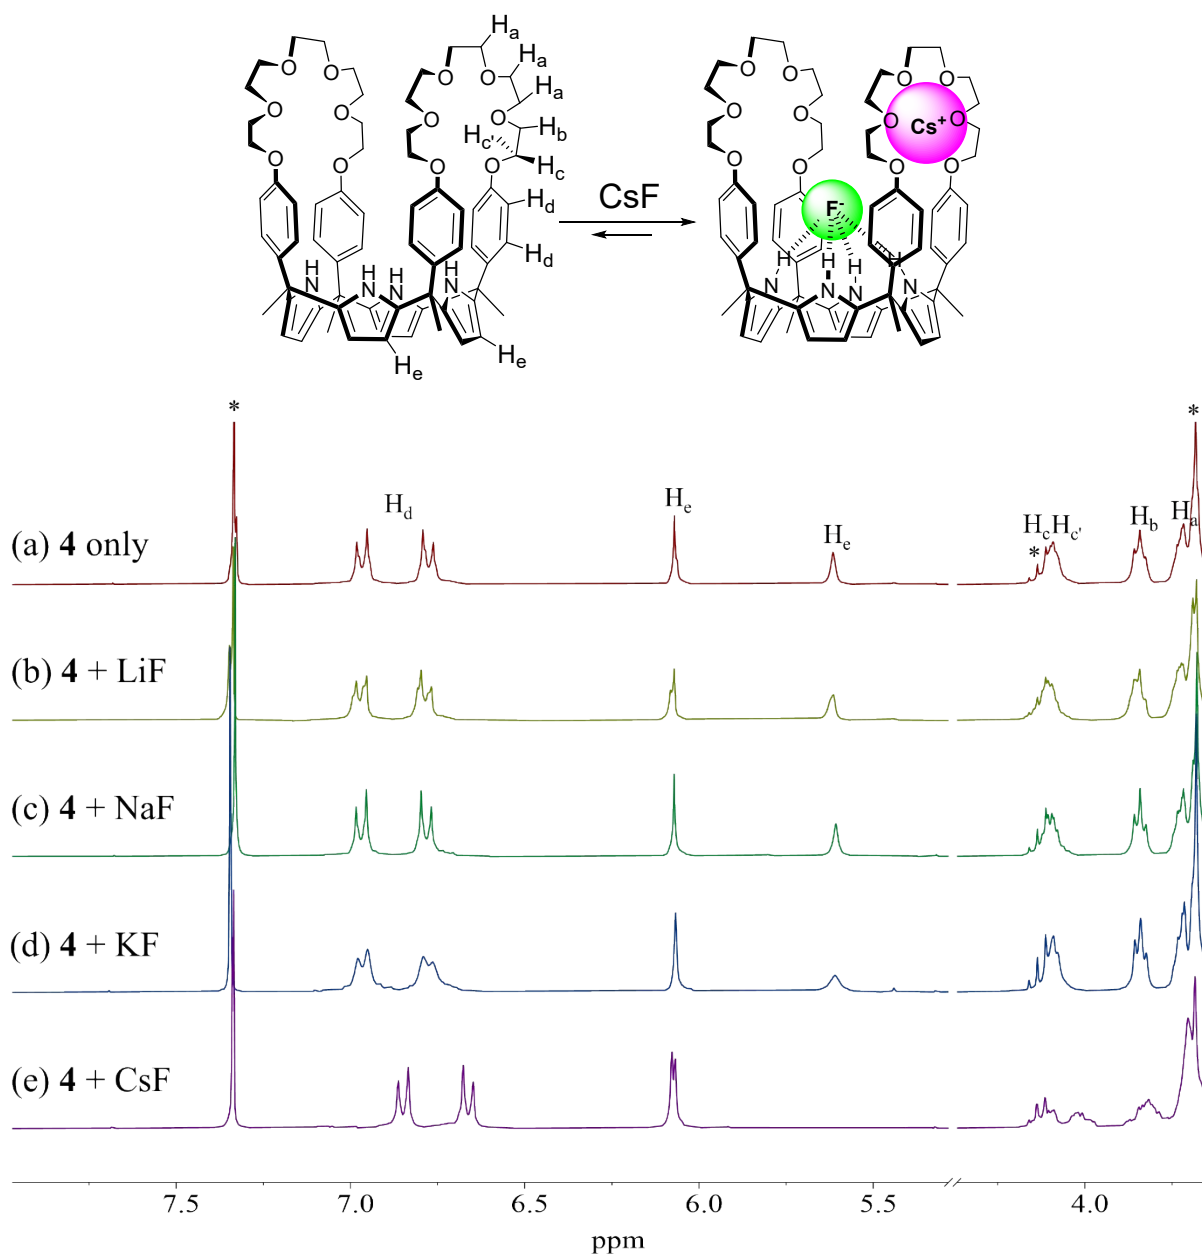

**Fig. S15** Top: Putative binding mode of receptor **4** for CsF. Bottom: Partial  $^1\text{H}$  NMR spectra (300 MHz, 25 °C) of receptor **4** (3 mM) recorded in 10%  $\text{CD}_3\text{OD}$  in  $\text{CDCl}_3$  in the presence of an excess of the indicated alkali metal fluoride salts. The asterisk (\*) denotes a residual solvent peak.

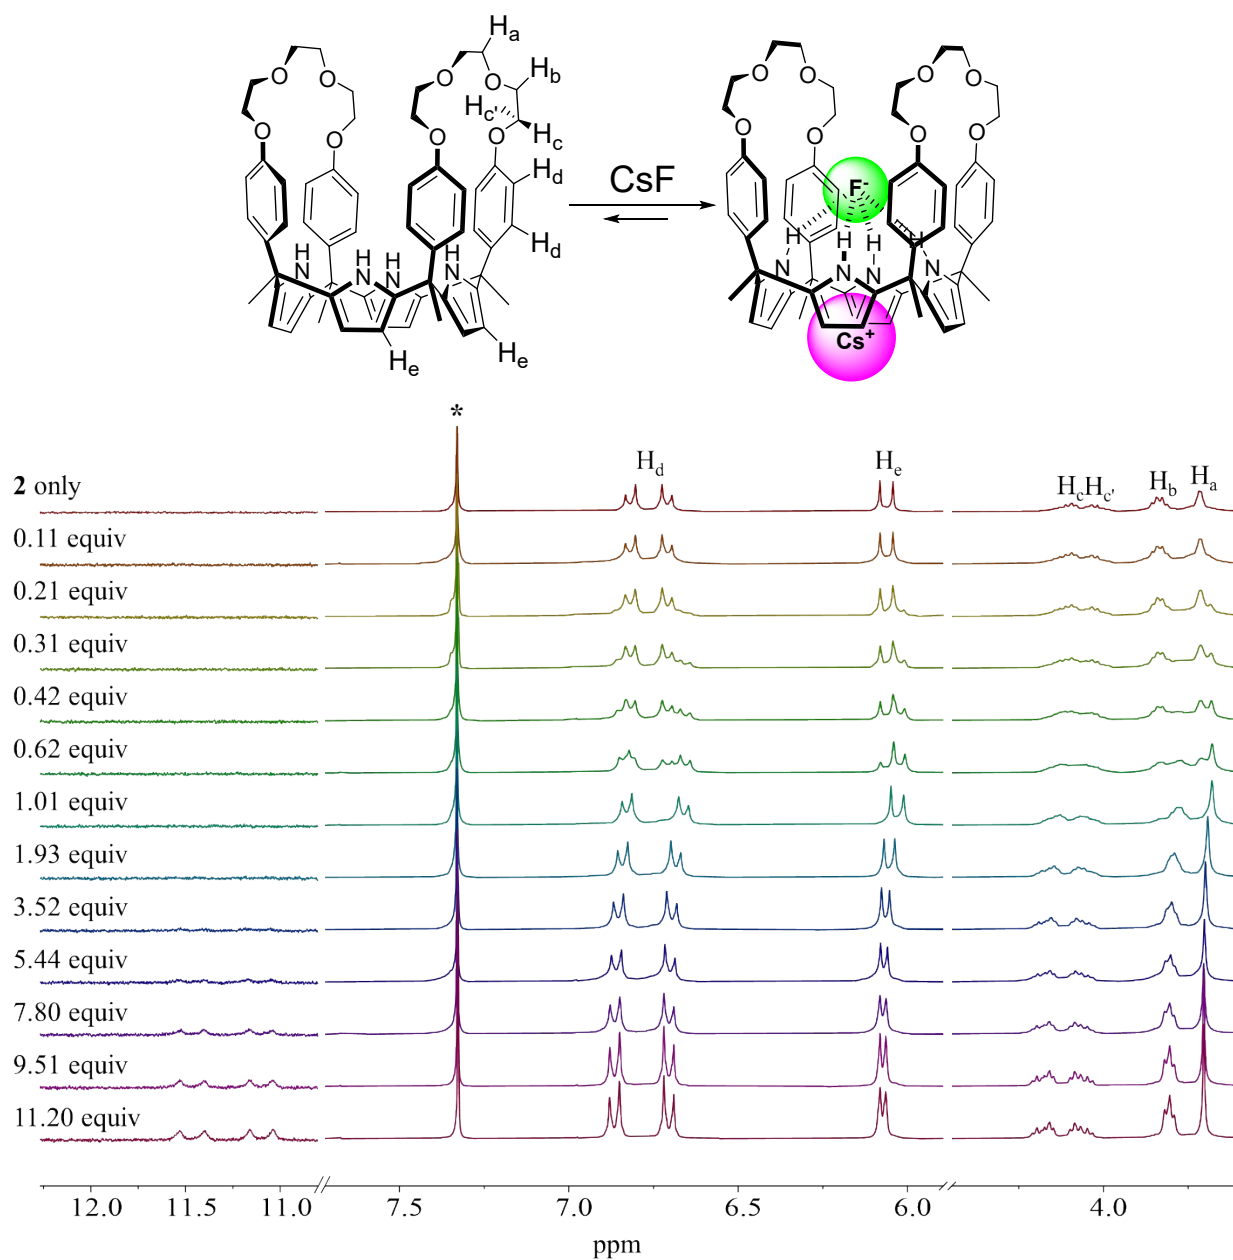

**Fig. S16** Partial  $^1\text{H}$  NMR spectra (300 MHz, 25 °C) recorded during the titration of **2** (3 mM) with  $\text{CsF}$  in  $\text{CDCl}_3:\text{MeOD}$  (9:1, v/v). The asterisk (\*) denotes a residual NMR solvent peak.

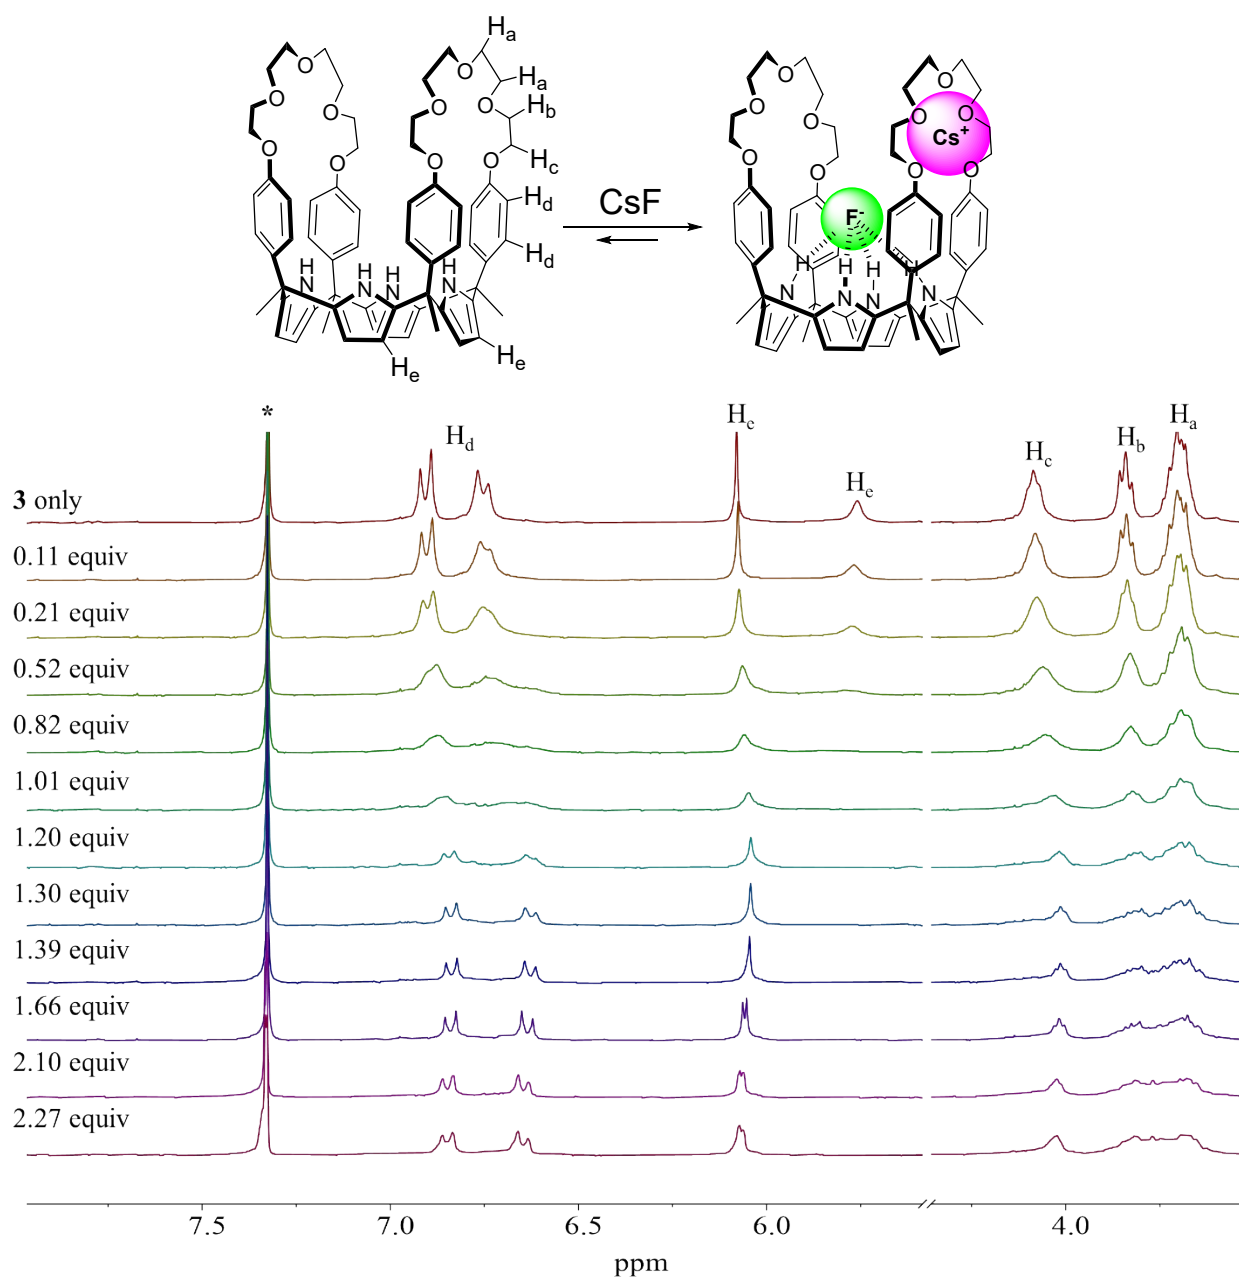

**Fig. S17** Partial  $^1\text{H}$  NMR spectra (300 MHz, 25  $^\circ\text{C}$ ) recorded during the titration of **3** (3 mM) with  $\text{CsF}$  in  $\text{CDCl}_3:\text{MeOD}$  (9:1, v/v). The asterisk (\*) denotes a residual NMR solvent peak.

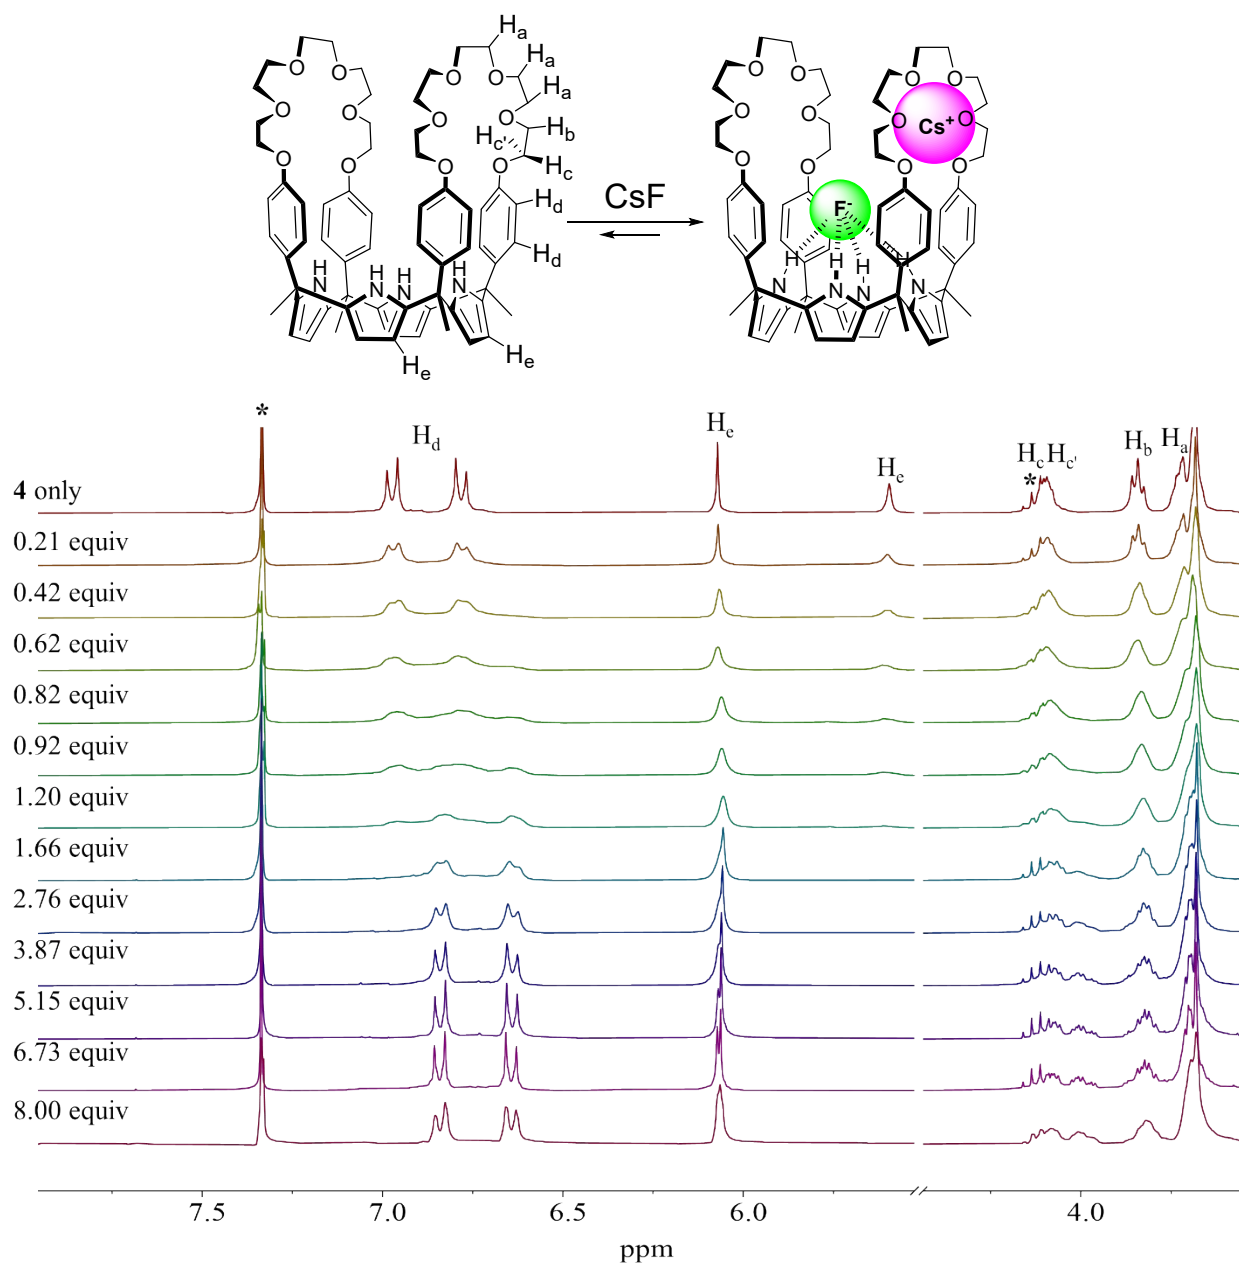

**Fig. S18** Partial <sup>1</sup>H NMR spectra (300 MHz, 25 °C) recorded during the titration of **4** (3 mM) with CsF in CDCl<sub>3</sub>:MeOD (9:1, v/v). The asterisks (\*) denote a residual solvent peak.

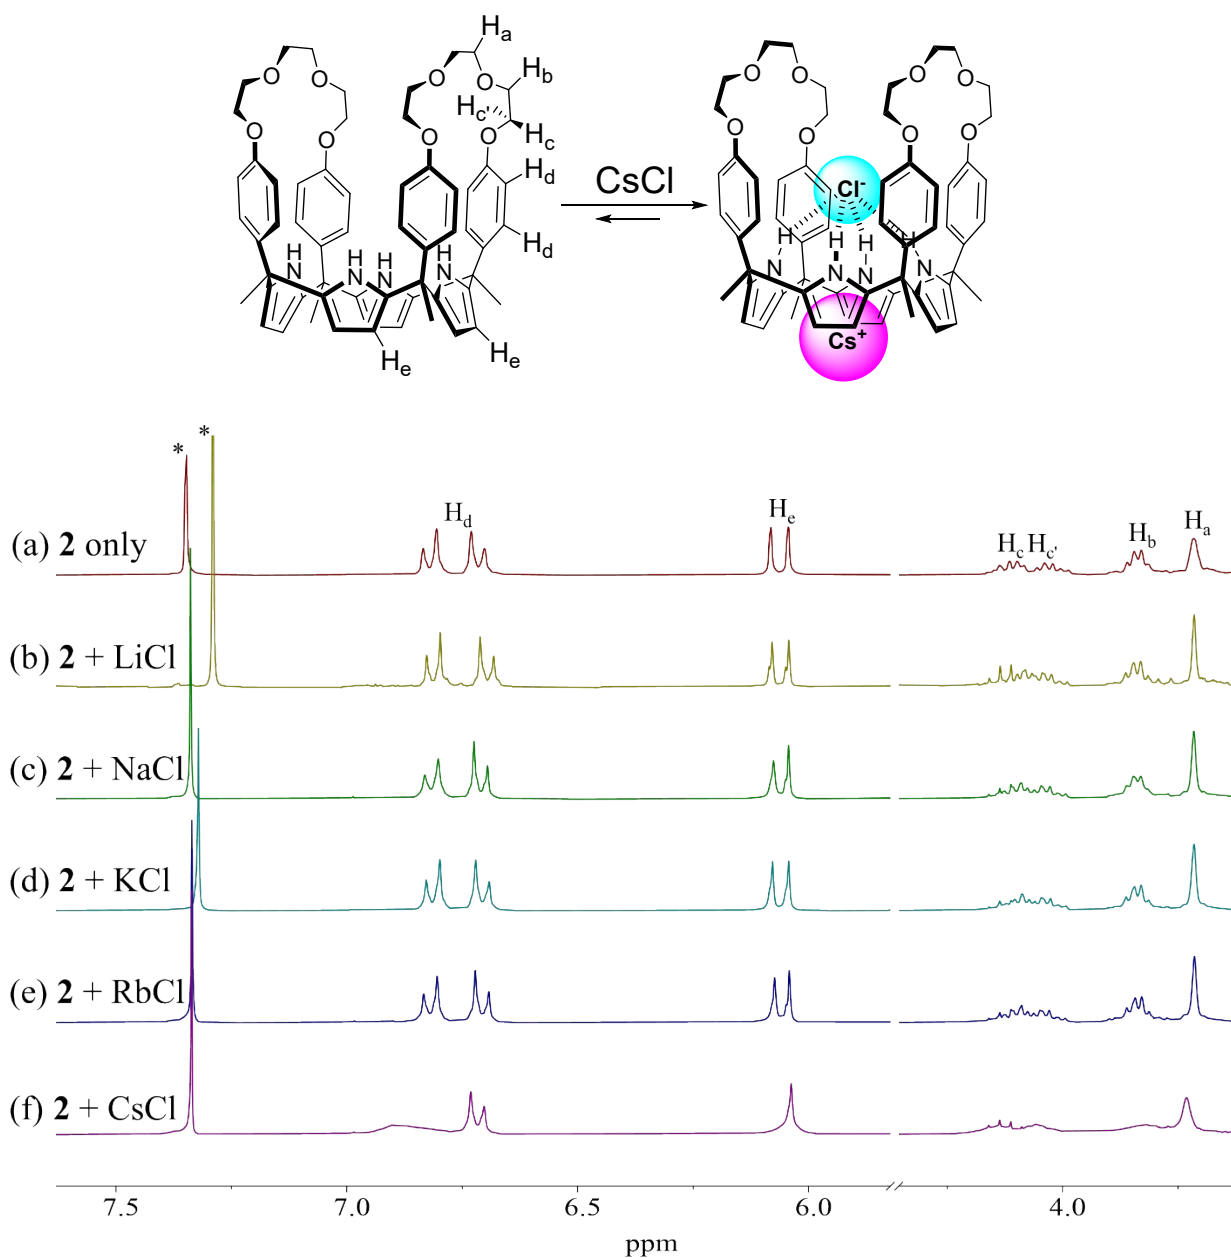

**Fig. S19** Top: Putative binding mode of receptor **2** for CsCl. Bottom: Partial  $^1H$  NMR spectra (300 MHz, 25 °C) of receptor **2** (3 mM) recorded in 10%  $CD_3OD$  in  $CDCl_3$  in the presence of an excess of the indicated alkali metal chloride salts. The asterisk (\*) denotes a residual NMR solvent peak.

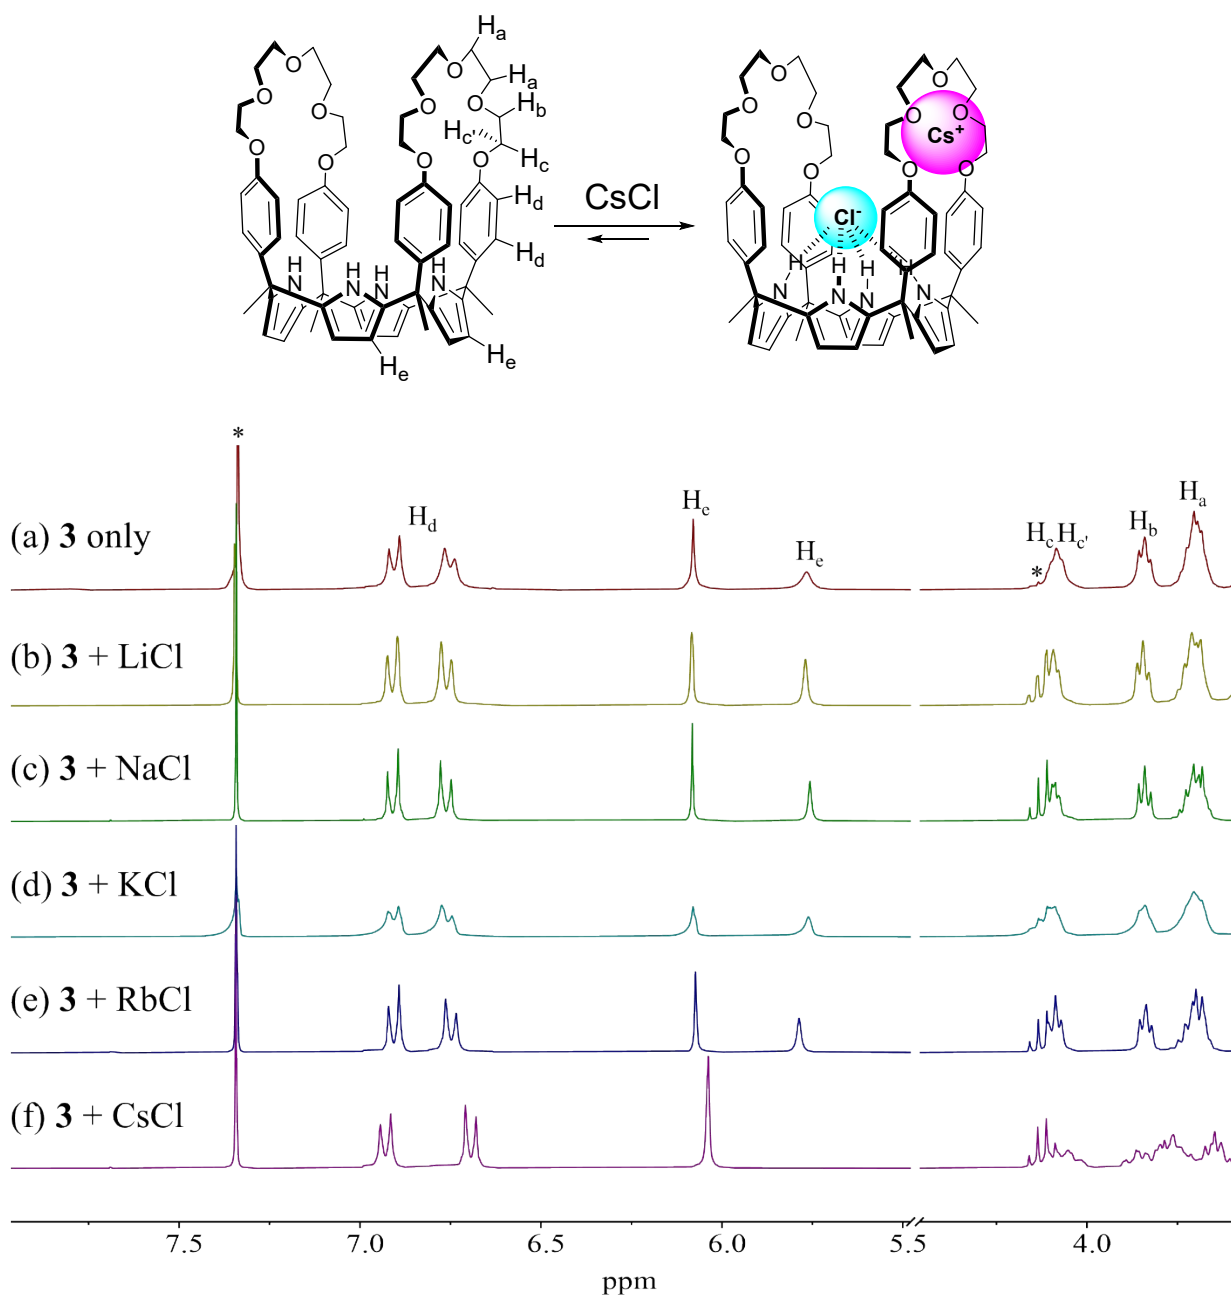

**Fig. S20** Top: Putative binding mode of receptor **3** for CsCl. Bottom: Partial <sup>1</sup>H NMR spectra (300 MHz, 25 °C) of receptor **3** (3 mM) recorded in 10% CD<sub>3</sub>OD in CDCl<sub>3</sub> in the presence of an excess of the indicated alkali metal chloride salts. The asterisks (\*) denotes residual solvent peaks.

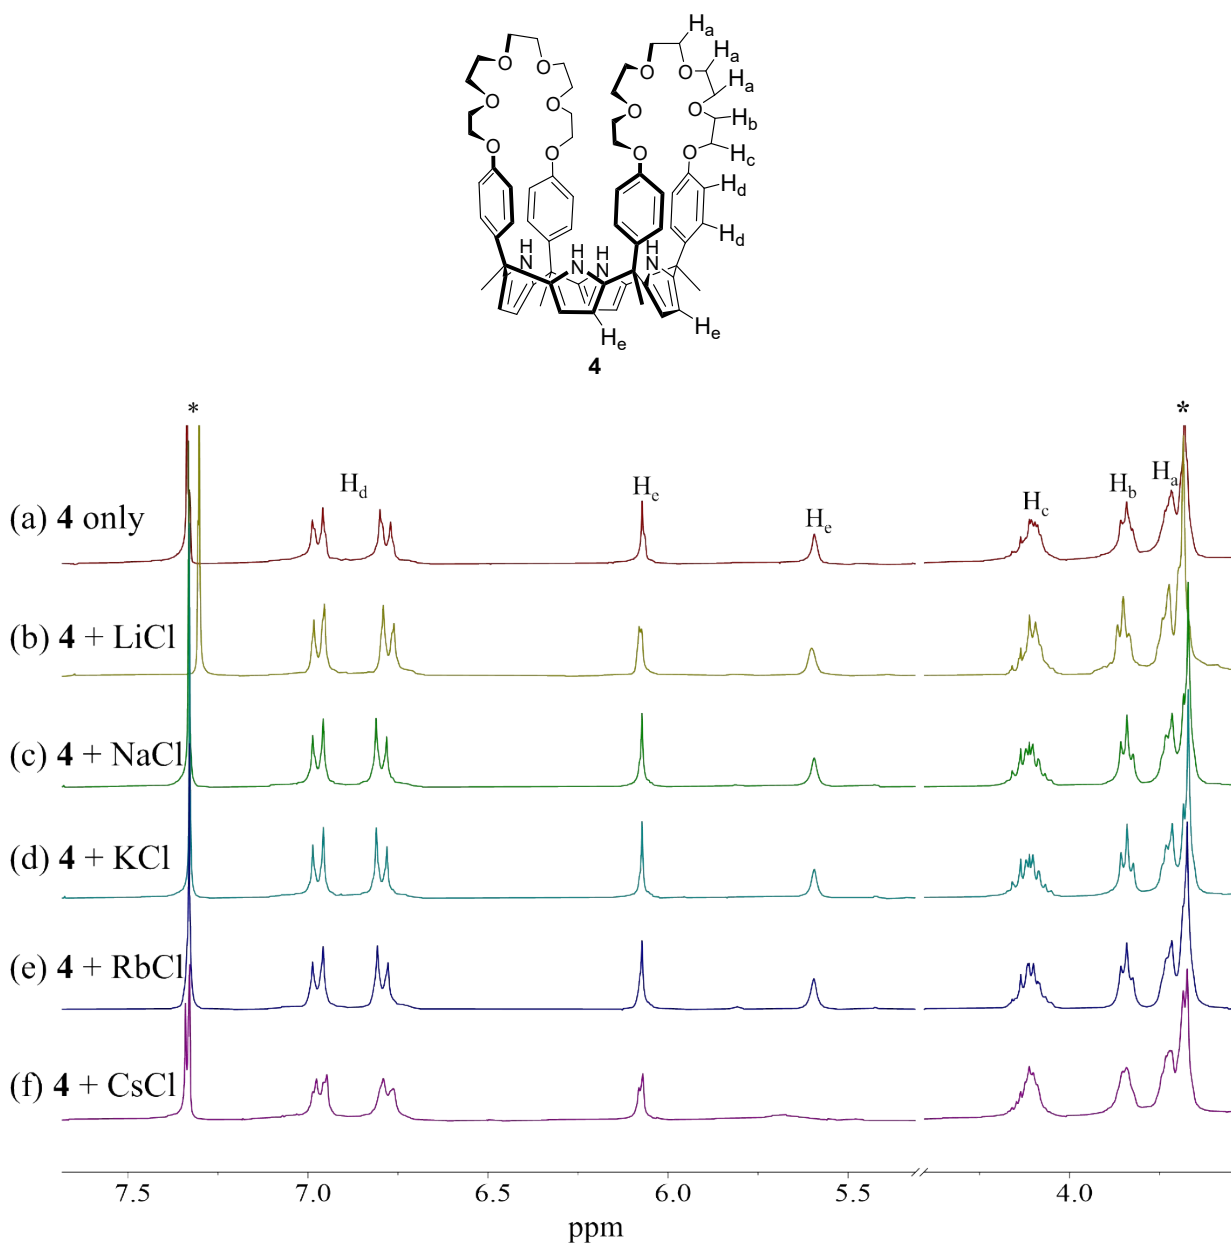

**Fig. S21** Partial  $^1\text{H}$  NMR spectra (300 MHz, 25  $^\circ\text{C}$ ) of receptor **4** (3 mM) recorded in 10%  $\text{CD}_3\text{OD}$  in  $\text{CDCl}_3$  in the presence of an excess of the indicated alkali metal chloride salts. The asterisk (\*) denotes residual solvent peaks.

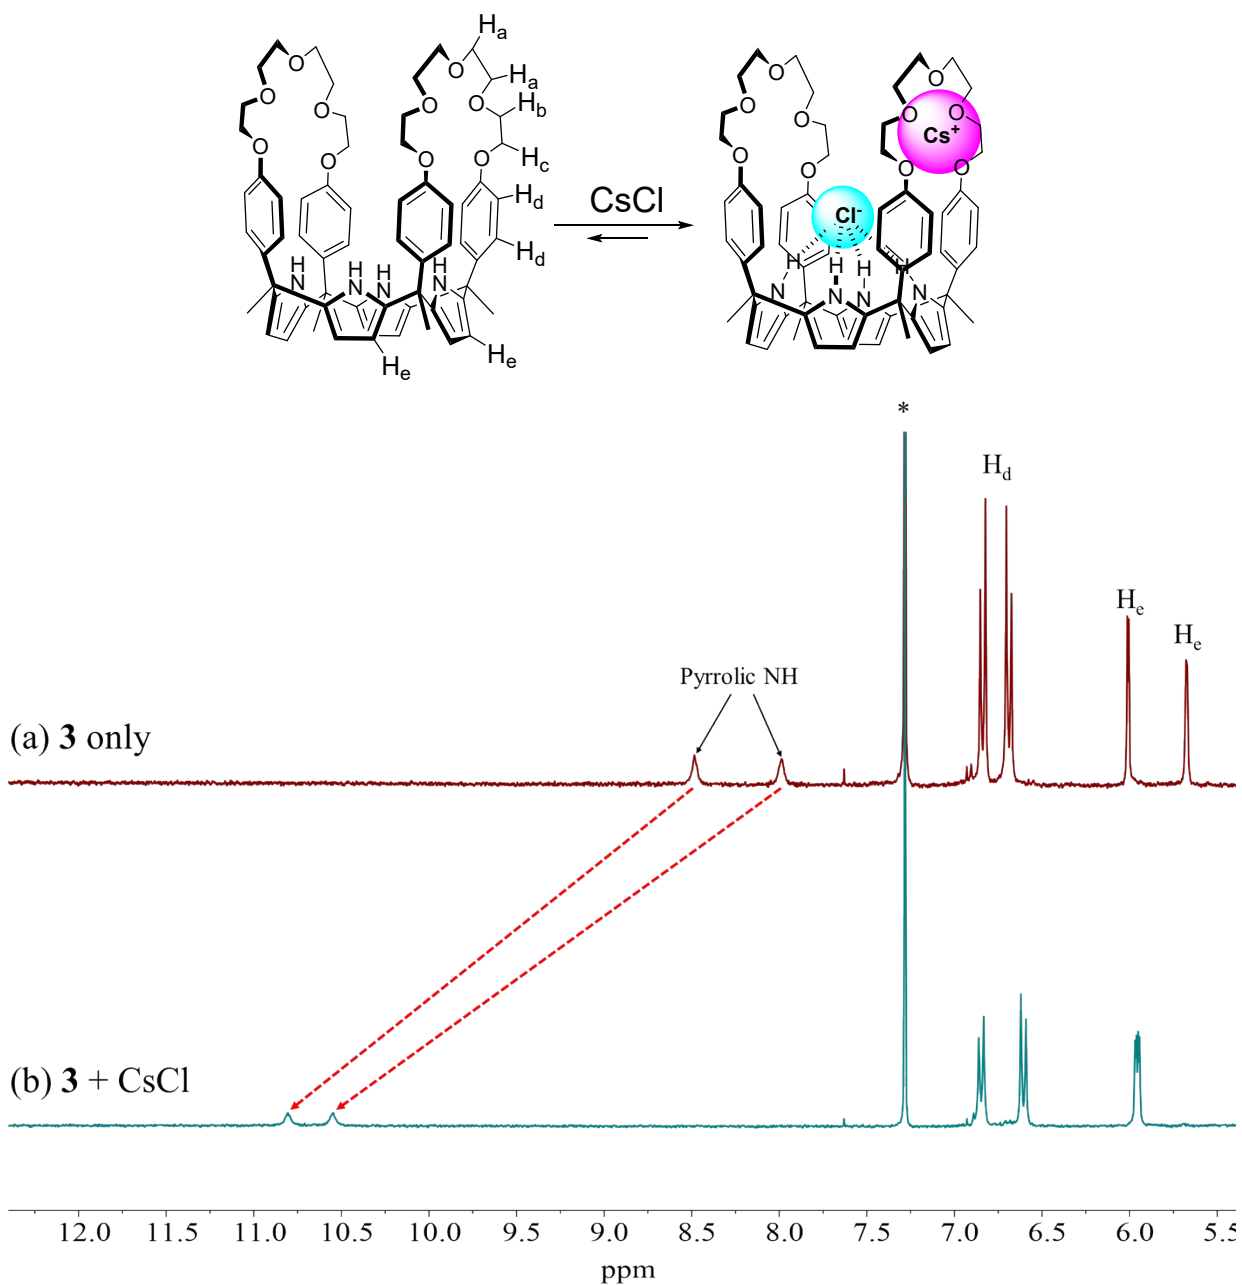

**Fig. S22** Partial <sup>1</sup>H NMR spectra (300 MHz, 25 °C) of receptor **3** (3 mM) recorded in 10% CH<sub>3</sub>OH in CDCl<sub>3</sub> in the presence of an excess of the indicated cesium chloride salts. The asterisk (\*) denotes residual solvent peaks.

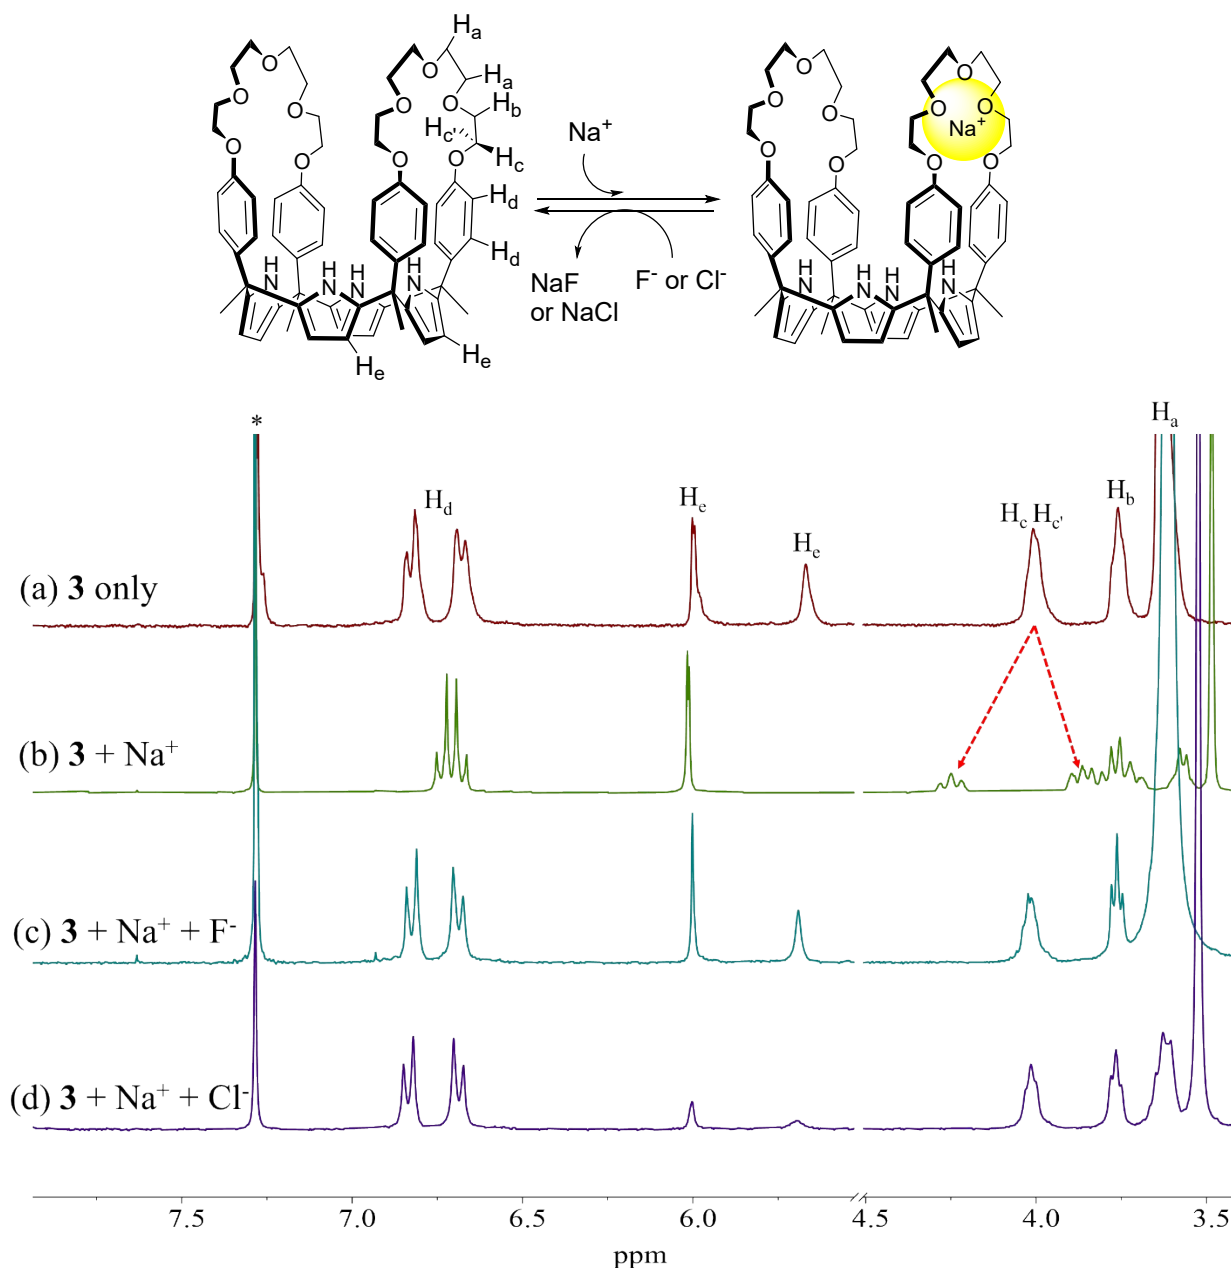

**Fig. S23** Top: Proposed binding behavior of receptor **3** for  $\text{Na}^+$  in the absence and presence of  $\text{F}^-$  and  $\text{Cl}^-$ . Bottom: Partial  $^1\text{H}$  NMR spectra (300 MHz, 25 °C) of (a) **3** (3 mM) only, (b) **3** + excess  $\text{NaClO}_4$ , (c) **3** + excess  $\text{NaClO}_4$  + excess TBAF, (d) **3** + excess  $\text{NaClO}_4$  + excess TBACl in 10%  $\text{CD}_3\text{OD}$  in  $\text{CDCl}_3$ . The asterisk (\*) denotes a residual NMR solvent peak.

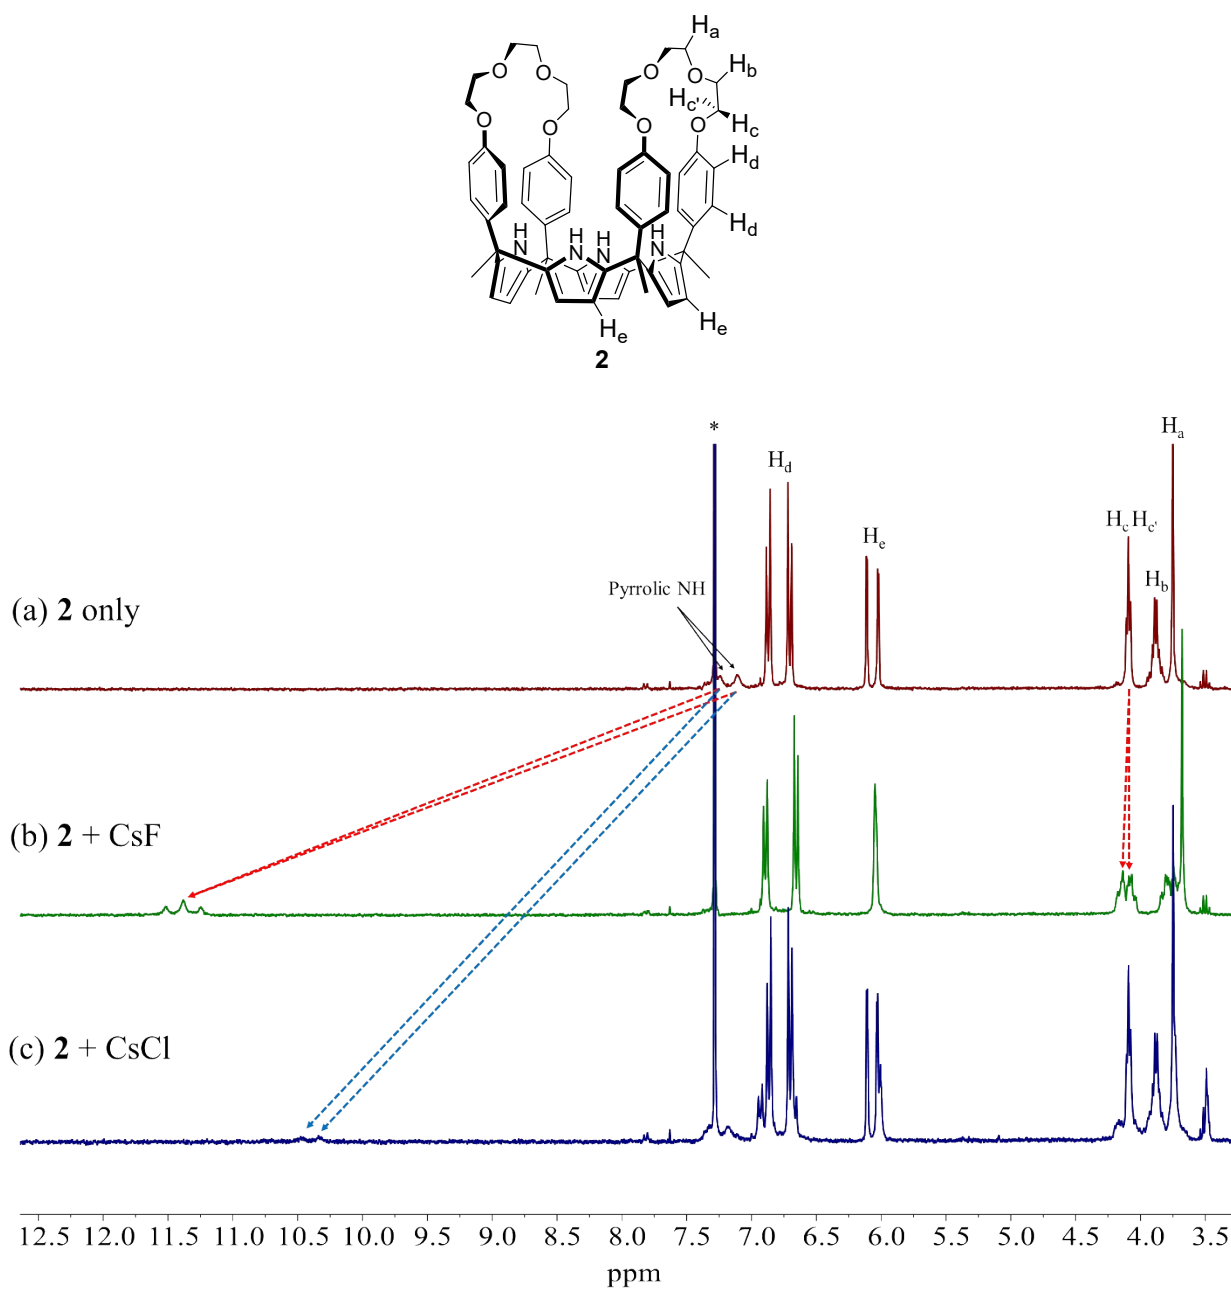

**Fig. S24** Partial <sup>1</sup>H NMR spectra (300 MHz, 25 °C) of receptor **2** (3 mM) before and after the addition of solid CsF (5.0 equiv) and CsCl (5.0 equiv) in CDCl<sub>3</sub>. The asterisk denotes a residual NMR solvent peak.

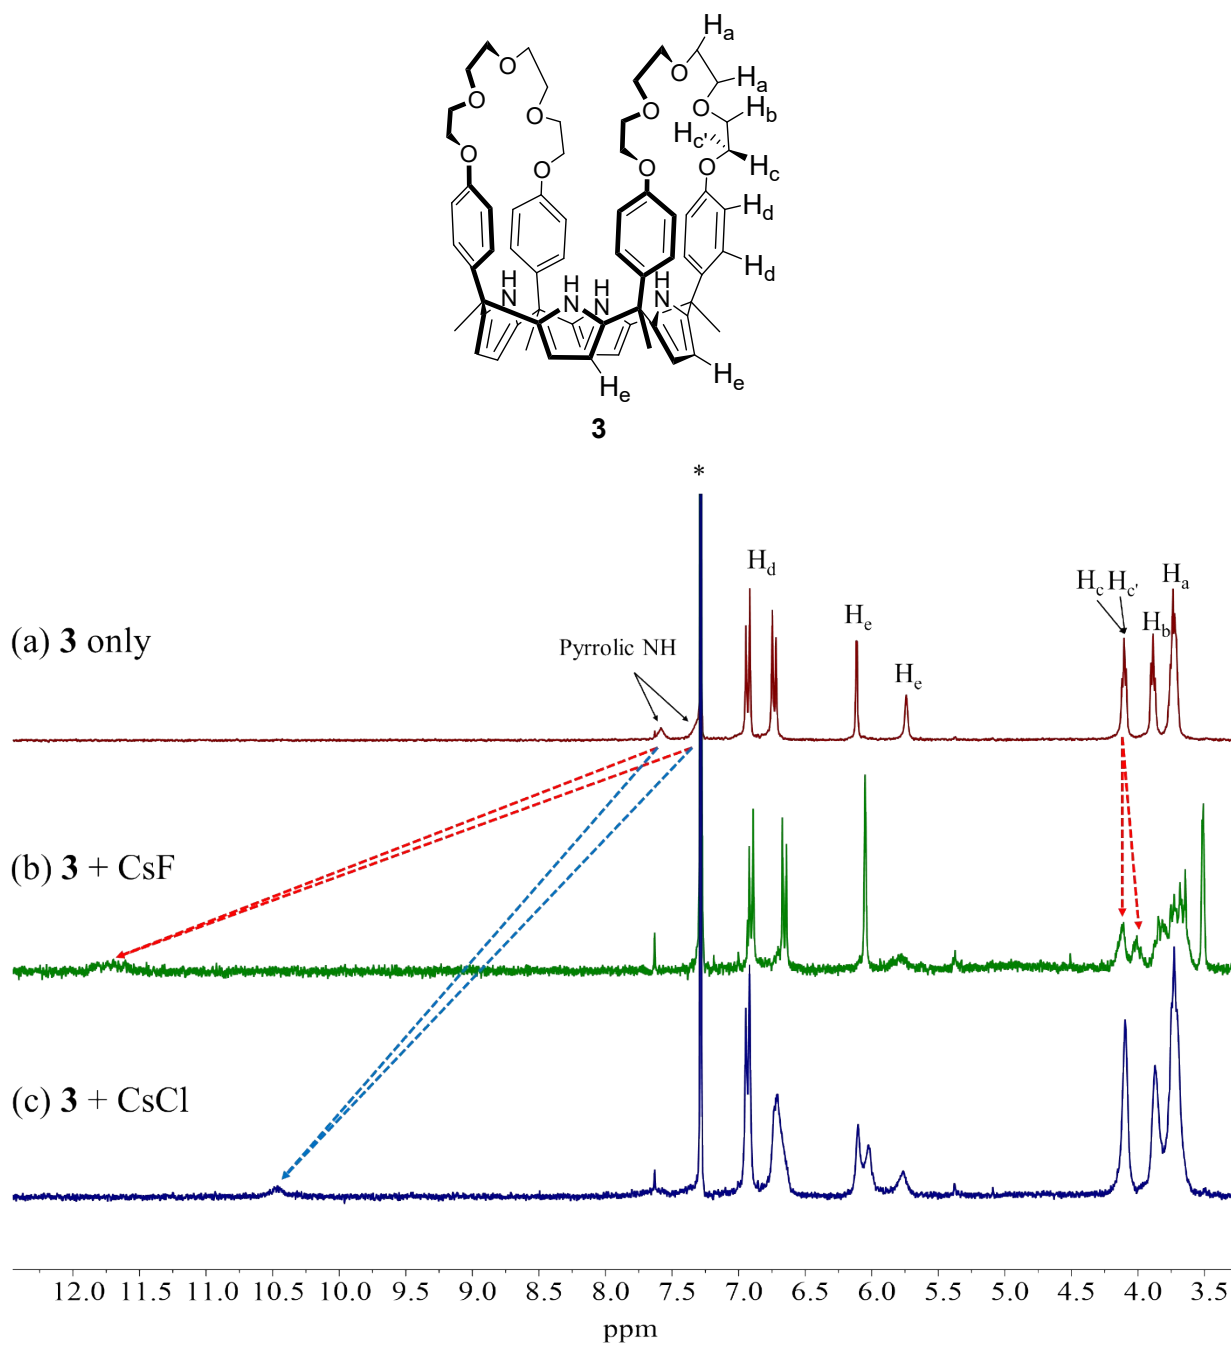

**Fig. S25** Partial  $^1\text{H}$  NMR spectra (300 MHz, 25  $^\circ\text{C}$ ) of receptor **3** (3 mM) before and after the addition of solid CsF (5.0 equiv) and CsCl (5.0 equiv) in  $\text{CDCl}_3$ . The asterisk denotes a residual NMR solvent peak.

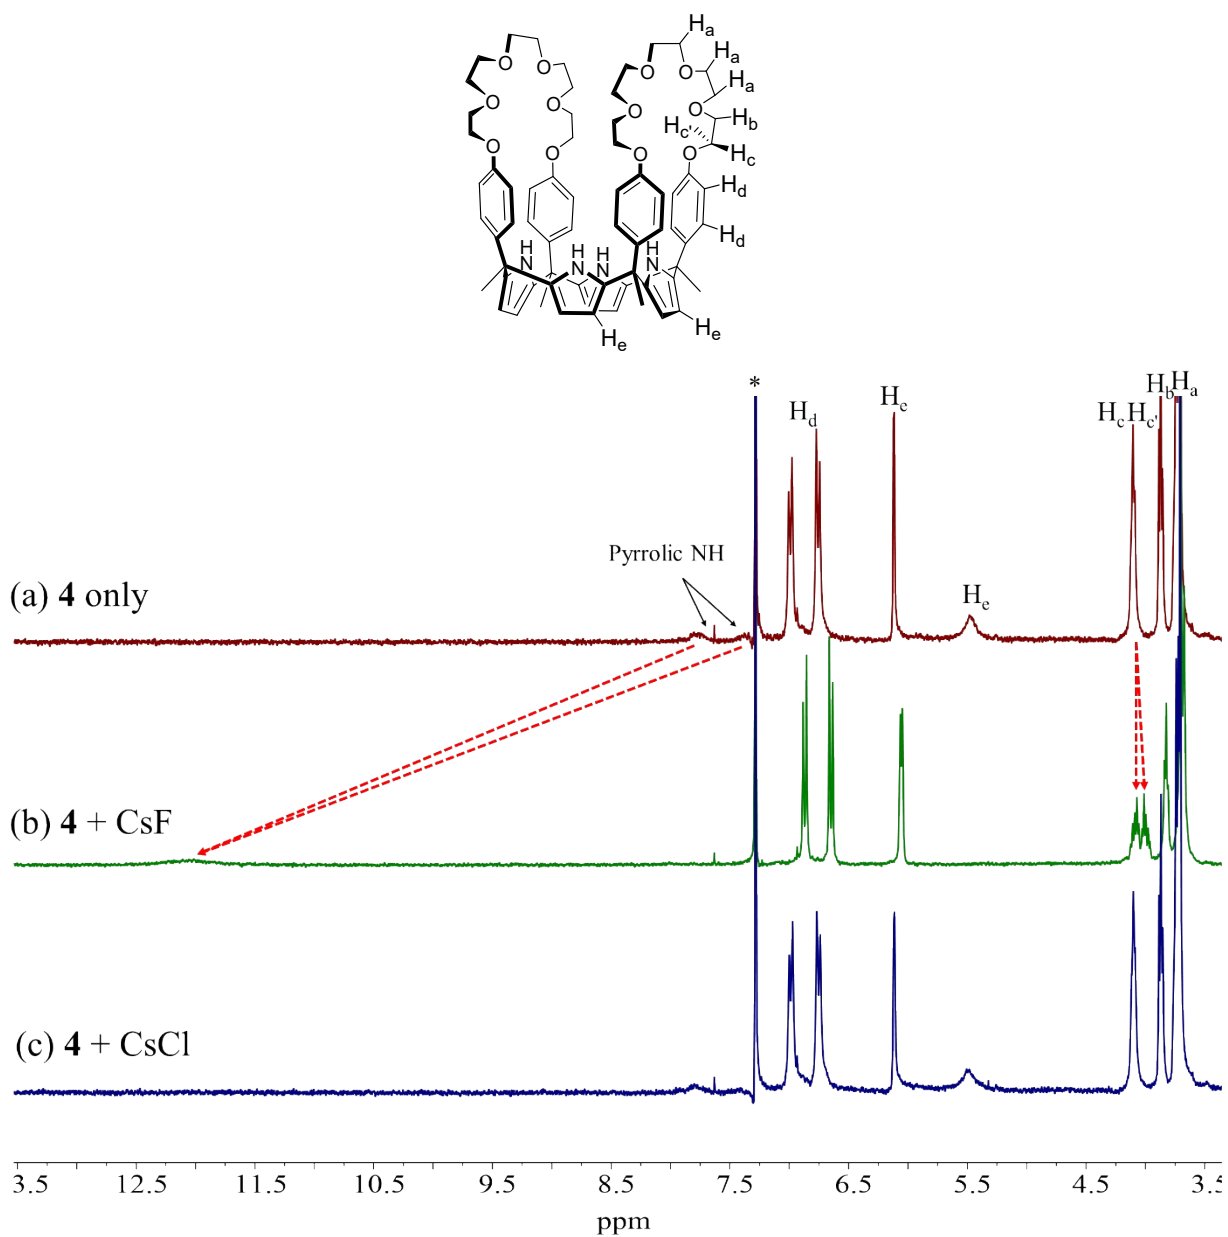

**Fig. S26** Partial  $^1\text{H}$  NMR spectra (300 MHz, 25  $^\circ\text{C}$ ) of receptor **4** (3 mM) before and after the addition of solid CsF (5.0 equiv) and CsCl (5.0 equiv) in  $\text{CDCl}_3$ . The asterisk denotes a residual NMR solvent peak.

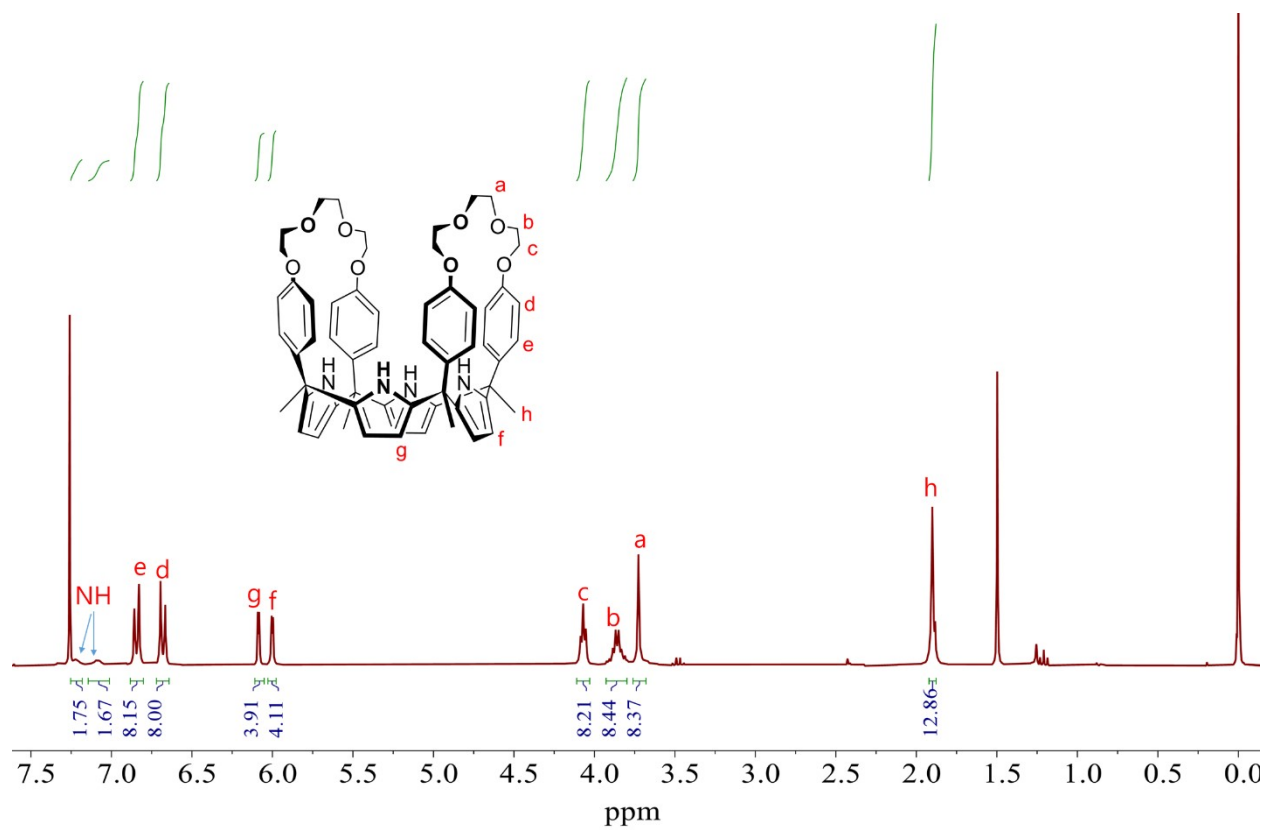

**Fig. S27**  $^1\text{H}$  NMR spectrum of **2** recorded in  $\text{CDCl}_3$ .

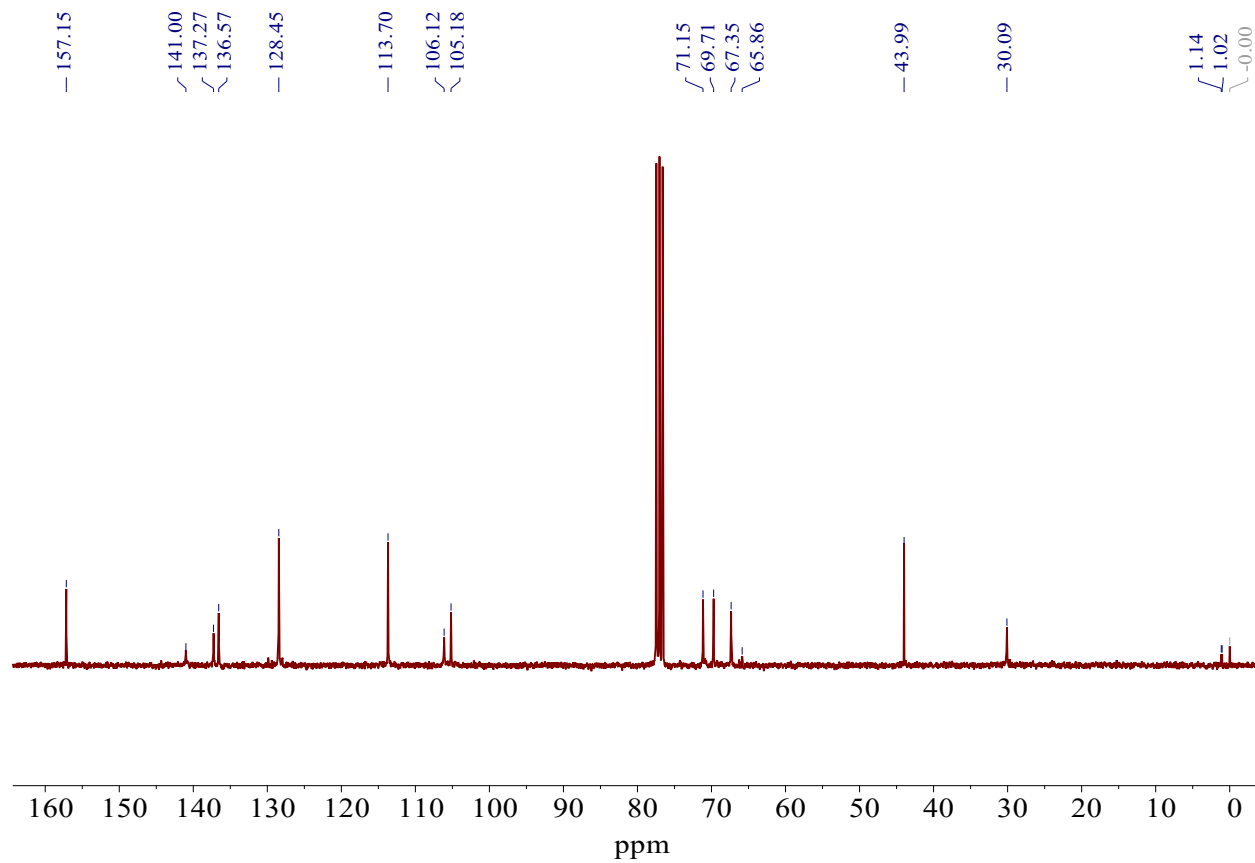

**Fig. S28** <sup>13</sup>C NMR spectrum of **2** recorded in CDCl<sub>3</sub>.

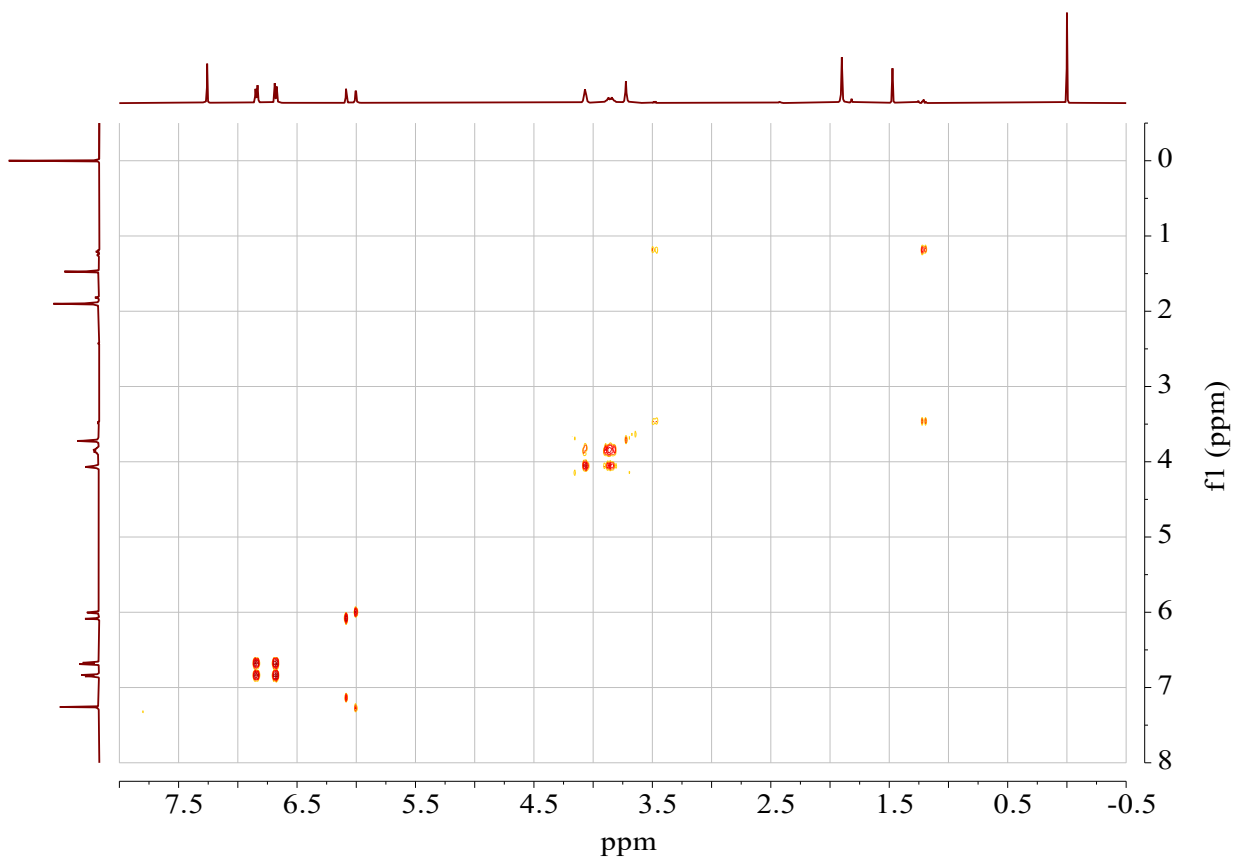

**Fig. S29** H-H COSY NMR spectrum (300 MHz, 25 °C) of **2** in CDCl<sub>3</sub>.

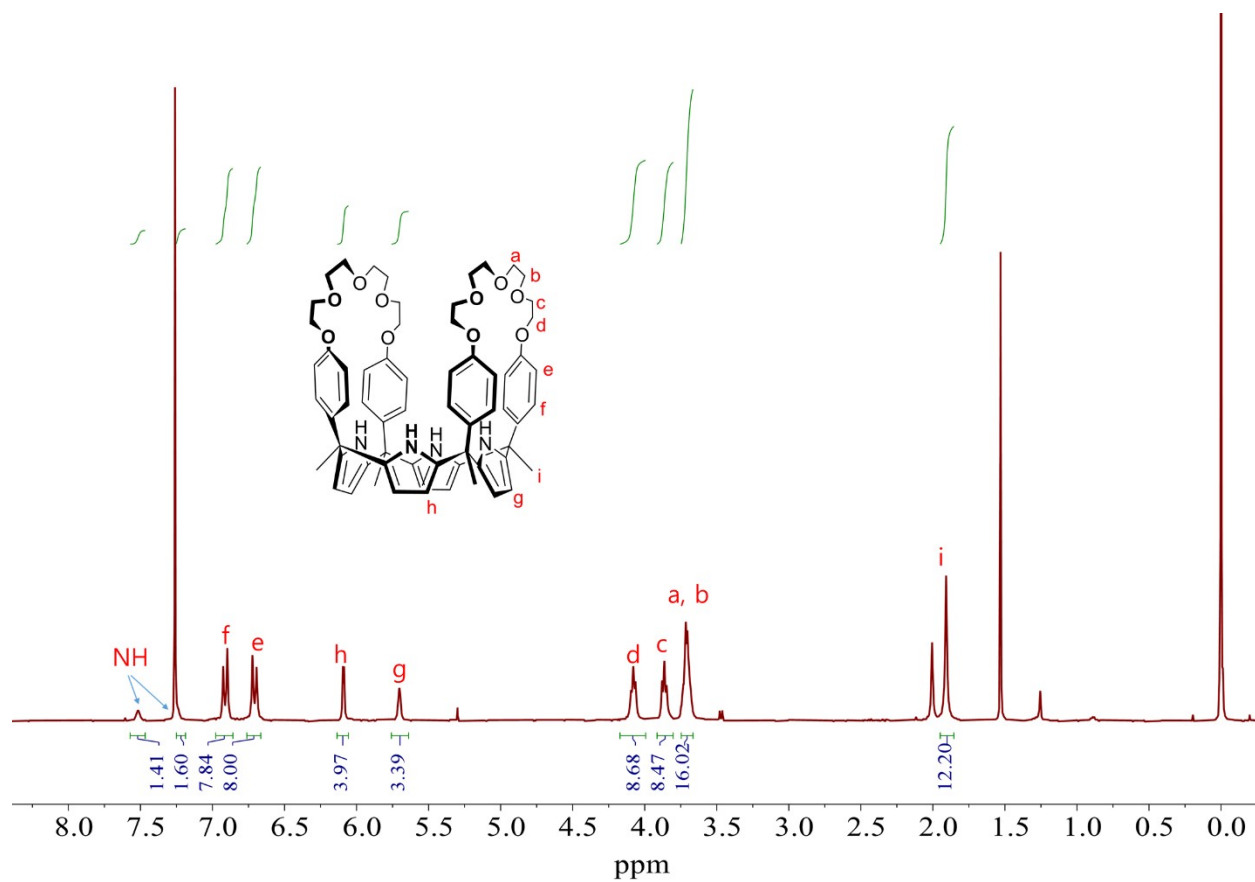

**Fig. S30**  $^1\text{H}$  NMR spectrum of **3** recorded in  $\text{CDCl}_3$ .

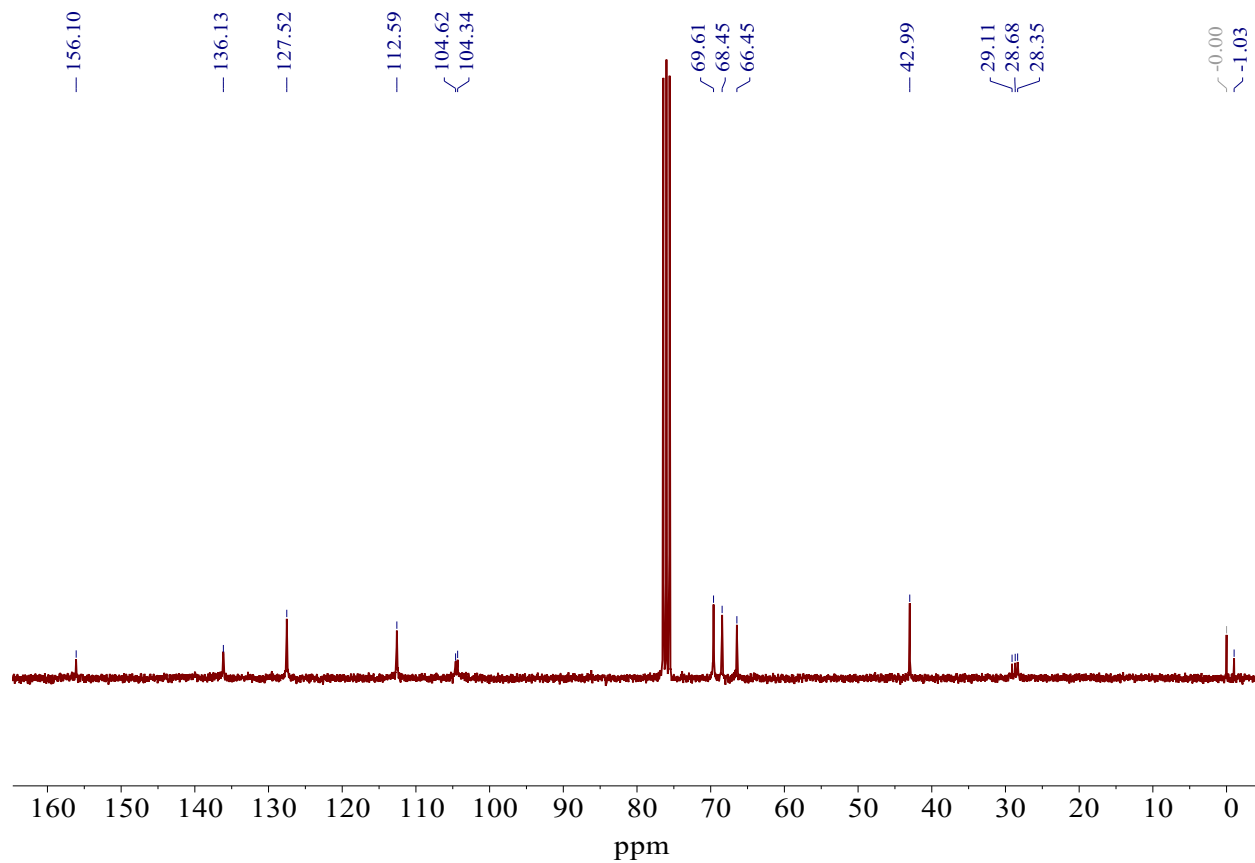

**Fig. S31**  $^{13}\text{C}$  NMR spectrum of **3** recorded in  $\text{CDCl}_3$ .

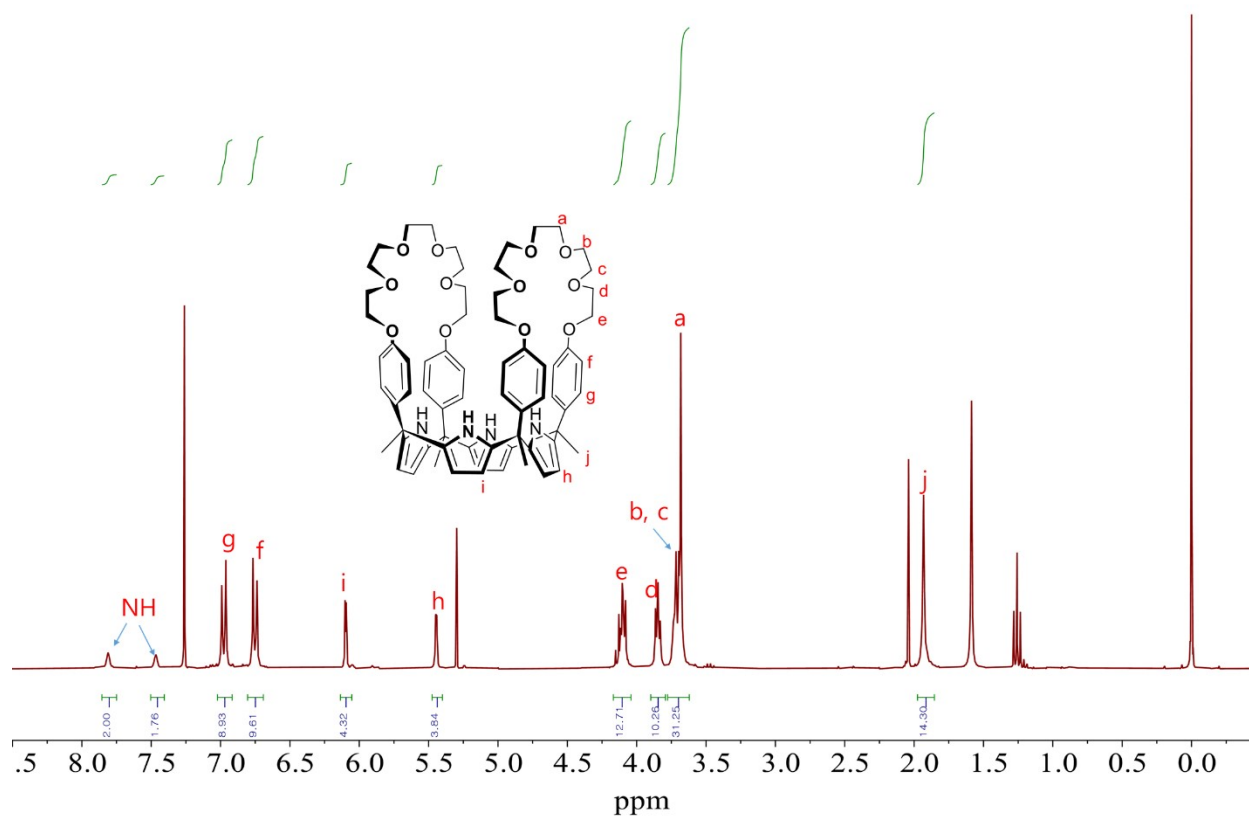

**Fig. S32**  $^1\text{H}$  NMR spectrum of **4** recorded in  $\text{CDCl}_3$ .

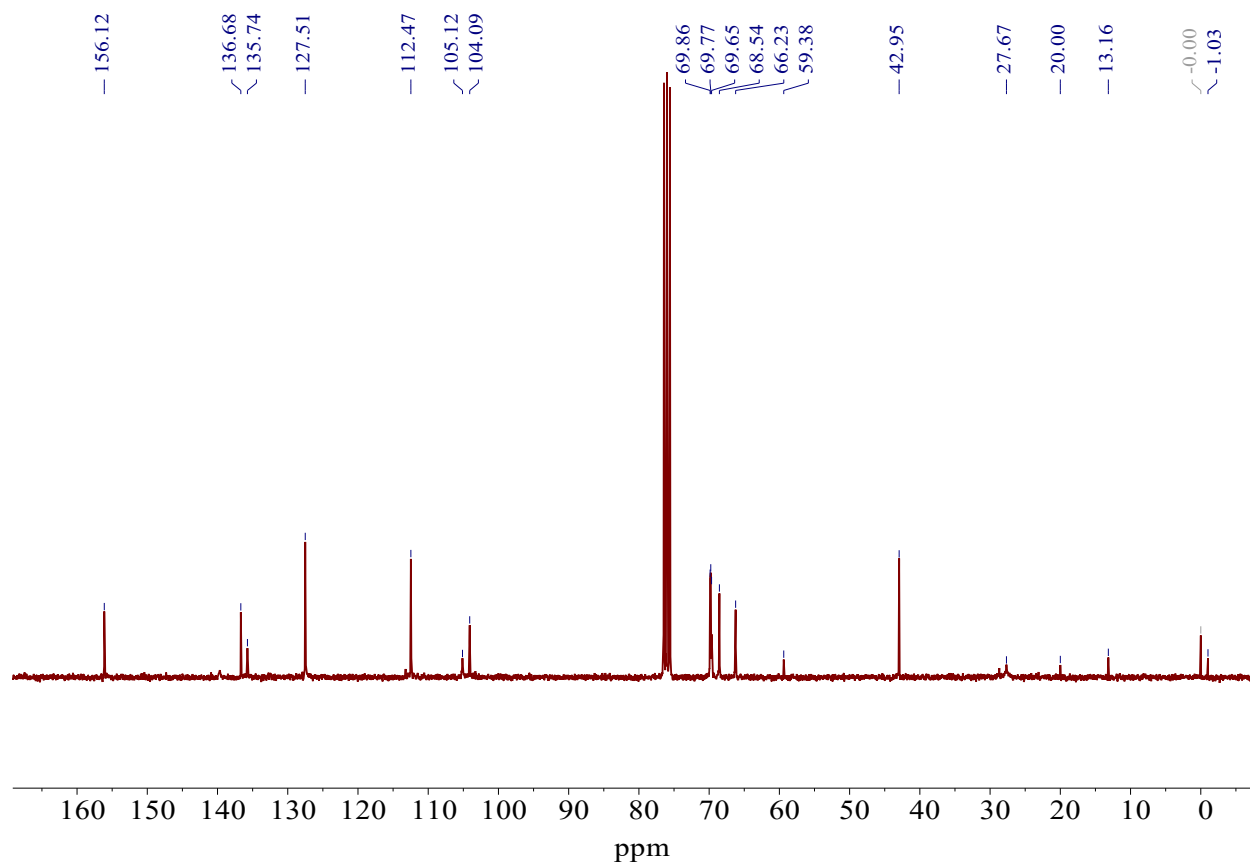

**Fig. S33**  $^{13}\text{C}$  NMR spectrum of **4** recorded in  $\text{CDCl}_3$ .

Data : YJH-C4P CE4\_HR      Date : 24-Jan-2021 14:59

Instrument : MStation

Sample : -

Note : -

Inlet : Direct      Ion Mode : FAB+

RT : 3.40 min      Scan# : 52

Elements : C 100/1, H 100/1, N 8/1, O 8/1

Mass Tolerance : 1000ppm, 3mmu if m/z > 3

Unsaturation (U.S.) : -0.5 - 31.0

|   | Observed m/z | Int% | Err[ppm / mmu] | U.S. Composition   |
|---|--------------|------|----------------|--------------------|
| 1 | 969.4825     | 7.87 | +2.3 / +2.3    | 30.5 C60 H65 N4 O8 |

**Fig. S34** HR FAB mass data of **2**.

# Single Mass Analysis

Tolerance = 50.0 PPM / DBE: min = -30.0, max = 80.0

Element prediction: Off

Number of isotope peaks used for i-FIT = 5

Monoisotopic Mass, Even Electron Ions

334 formula(e) evaluated with 21 results within limits (up to 5 closest results for each mass)

Elements Used:

| Mass     | Calc. Mass | mDa  | PPM  | DBE  | Formula       | i-FIT | i-FIT Norm | Fit Conf % | C  | H  | N | O |
|----------|------------|------|------|------|---------------|-------|------------|------------|----|----|---|---|
| 969.4792 | 969.4784   | 0.8  | 0.8  | 43.5 | C72 H61 N2 O  | 153.8 | 3.428      | 3.24       | 72 | 61 | 2 | 1 |
|          | 969.4802   | -1.0 | -1.0 | 30.5 | C60 H65 N4 O8 | 151.3 | 0.842      | 43.09      | 60 | 65 | 4 | 8 |
|          | 969.4744   | 4.8  | 5.0  | 39.5 | C67 H61 N4 O3 | 152.9 | 2.503      | 8.18       | 67 | 61 | 4 | 3 |
|          | 969.4843   | -5.1 | -5.3 | 34.5 | C65 H65 N2 O6 | 152.5 | 2.062      | 12.72      | 65 | 65 | 2 | 6 |
|          | 969.4690   | 10.2 | 10.5 | 30.5 | C61 H65 N2 O9 | 151.5 | 1.116      | 32.76      | 61 | 65 | 2 | 9 |

240829 CE4 CAP ASAP 631 (5.837)

1: TOF MSASAP

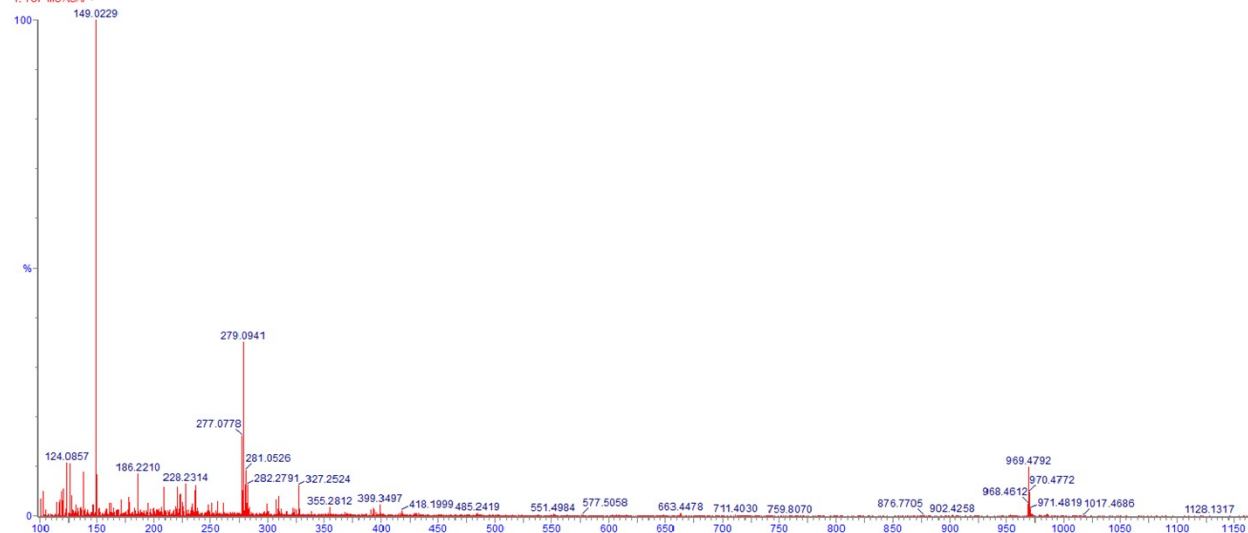

Fig. S35 HR ESI mass spectrum of 2.

Data : YJH-C4P CE5\_HR      Date : 26-Jan-2021 16:04

Instrument : MStation

Sample : -

Note : -

Inlet : Direct      Ion Mode : FAB+

RT : 4.40 min      Scan# : 67

Elements : C 100/1, H 100/1, N 4/1, O 10/1

Mass Tolerance : 1000ppm, 3mmu if m/z > 3

Unsaturation (U.S.) : -0.5 - 35.0

|   | Observed m/z | Int%  | Err[ppm / mmu] | U.S. Composition    |
|---|--------------|-------|----------------|---------------------|
| 1 | 1057.5326    | 13.21 | -0.1 / -0.1    | 30.5 C64 H73 N4 O10 |

**Fig. S36** HR FAB mass data of **3**.

[ Mass Spectrum ]  
Data : YJH-C4P CE5 Date : 22-Jan-2021 17:04  
Inlet : Direct Ion Mode : FAB+  
RT : 0.90 min Scan# : 28

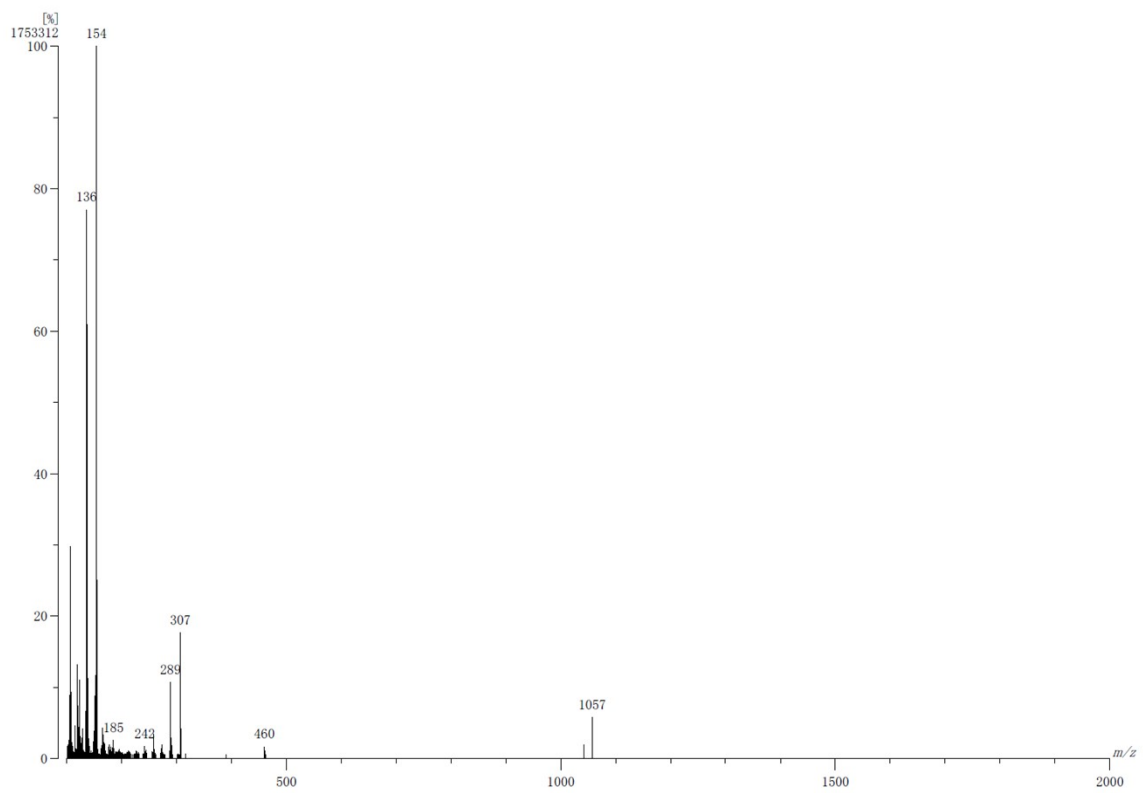

**Fig. S37** FAB mass spectrum of compound **3**.

Data : YJH-C4P CE6\_HR      Date : 26-Jan-2021 16:29  
 Instrument : MStation  
 Sample : -  
 Note : -  
 Inlet : Direct      Ion Mode : FAB+  
 RT : 2.47 min      Scan# : 38  
 Elements : C 100/1, H 100/1, N 4/1, O 12/1  
 Mass Tolerance : 1000ppm, 3mmu if m/z > 3  
 Unsaturation (U.S.) : -0.5 - 35.0

|   | Observed m/z | Int% | Err[ppm / mmu] | U.S. Composition    |
|---|--------------|------|----------------|---------------------|
| 1 | 1145.5830    | 9.86 | -1.8 / -2.1    | 30.5 C68 H81 N4 O12 |

**Fig. S38** HR FAB mass data of **4**.

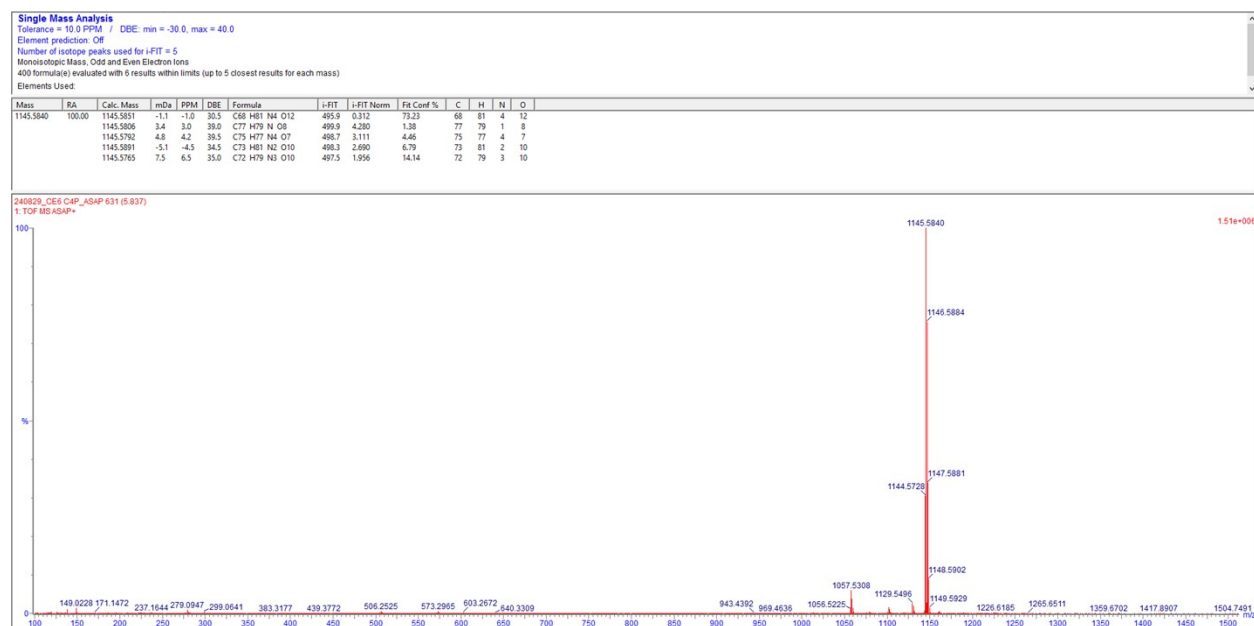

**Fig. S39** HR ESI mass spectrum of compound **4**

## 4. X-ray crystal data

**Table S1.** Crystal data and structure refinement for **2**·MeOH.

|                                   |                                                                               |          |
|-----------------------------------|-------------------------------------------------------------------------------|----------|
| Identification code               | <b>2</b> ·MeOH                                                                |          |
| Empirical formula                 | C <sub>63</sub> H <sub>69</sub> Cl <sub>6</sub> N <sub>4</sub> O <sub>9</sub> |          |
| Formula weight                    | 1238.92                                                                       |          |
| Temperature                       | 173(2) K                                                                      |          |
| Wavelength                        | 0.71073 Å                                                                     |          |
| Crystal system                    | Orthorhombic                                                                  |          |
| Space group                       | Pnma                                                                          |          |
| Unit cell dimensions              | a = 20.3119(4) Å                                                              | a = 90°. |
|                                   | b = 21.5671(5) Å                                                              | b = 90°. |
|                                   | c = 14.0259(3) Å                                                              | g = 90°. |
| Volume                            | 6144.3(2) Å <sup>3</sup>                                                      |          |
| Z                                 | 4                                                                             |          |
| Density (calculated)              | 1.339 Mg/m <sup>3</sup>                                                       |          |
| Absorption coefficient            | 0.339 mm <sup>-1</sup>                                                        |          |
| F(000)                            | 2596                                                                          |          |
| Crystal size                      | 0.282 x 0.258 x 0.203 mm <sup>3</sup>                                         |          |
| Theta range for data collection   | 1.732 to 28.303°.                                                             |          |
| Index ranges                      | -27<=h<=27, -28<=k<=28, -18<=l<=18                                            |          |
| Reflections collected             | 97609                                                                         |          |
| Independent reflections           | 7836 [R(int) = 0.0695]                                                        |          |
| Completeness to theta = 25.242°   | 100.0 %                                                                       |          |
| Absorption correction             | Semi-empirical from equivalents                                               |          |
| Max. and min. transmission        | 0.7457 and 0.7131                                                             |          |
| Refinement method                 | Full-matrix least-squares on F <sup>2</sup>                                   |          |
| Data / restraints / parameters    | 7836 / 0 / 397                                                                |          |
| Goodness-of-fit on F <sup>2</sup> | 1.049                                                                         |          |
| Final R indices [I>2sigma(I)]     | R1 = 0.0919, wR2 = 0.2701                                                     |          |
| R indices (all data)              | R1 = 0.1351, wR2 = 0.3085                                                     |          |
| Extinction coefficient            | n/a                                                                           |          |
| Largest diff. peak and hole       | 2.261 and -1.748 e.Å <sup>-3</sup>                                            |          |

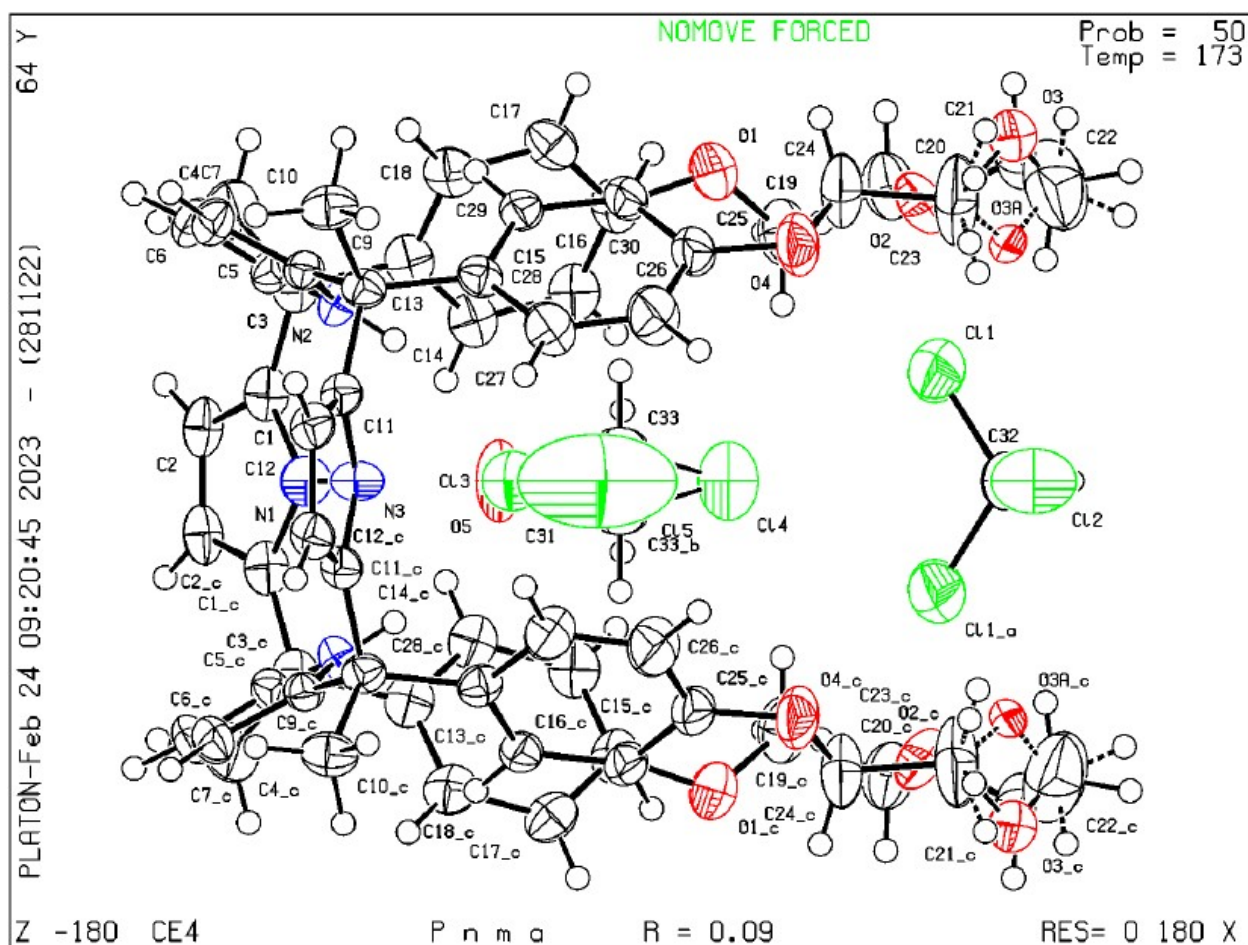

**Fig. S40** View of 2·MeOH complex. Displacement ellipsoids are scaled to the 50% probability level.

**X-ray Experimental for 3·Na<sup>+</sup>:** Crystals grew as clusters of thin, colorless plates by vapor diffusion of methanol/ethanol into a chloroform solution. The data crystal was cut from a larger crystal and had approximate dimensions; 0.29 x 0.19 x 0.050 mm. The data were collected on a Rigaku Oxford Diffraction HyPix6000E Dual Source diffractometer using a  $\mu$ -focus Cu K $\alpha$  radiation source ( $\lambda = 1.5418\text{\AA}$ ) with collimating mirror monochromators. A total of 3508 frames of data were collected using  $\omega$ -scans with a scan range of  $0.5^\circ$  and a counting time of 6.6 seconds per frame for frames collected with a detector offset of  $\pm 48.7^\circ$  and 26.3 seconds per frame with frames collected with a detector offset of  $\pm 107.8^\circ$ . The data were collected at 100 K using an Oxford Cryostream low temperature device. Details of crystal data, data collection and structure refinement are listed in Table S2. Data collection, unit cell refinement and data reduction were performed using Rigaku Oxford Diffraction's CrysAlisPro V 1.171.42.25a.<sup>3</sup> The structure was solved by direct methods using SHELXT<sup>4</sup> and refined by full-matrix least-squares on  $F^2$  with anisotropic displacement parameters for the non-H atoms using SHELXL-2018/3.<sup>5</sup> Structure analysis was aided by use of the programs PLATON<sup>6</sup> and OLEX2.<sup>7</sup> The hydrogen atoms on the carbon atoms were calculated in ideal positions with isotropic displacement parameters set to 1.2xUeq of the attached atom (1.5xUeq for methyl hydrogen atoms).

There was quite a bit of disordered solvent of various components. Both molecules of chloroform were disordered. H-bonded to the pyrrole groups was a mixture of acetone and ethanol. In the interior of the macrocycle was a disordered mixture of methanol and water molecules H-bound to one of the polyether groups. The H atoms on some of the oxygen atoms of the methanol and ethanol molecules could not be adequately modeled and were not included in the final refinement model.

The function,  $\sum w(|F_o|^2 - |F_c|^2)^2$ , was minimized, where  $w = 1/[(\sigma(F_o))^2 + (0.0789 \cdot P)^2 + (3.0482 \cdot P)]$  and  $P = (|F_o|^2 + 2|F_c|^2)/3$ .  $R_w(F^2)$  refined to 0.153, with  $R(F)$  equal to 0.0563 and a goodness of fit,  $S$ , = 1.05. Definitions used for calculating  $R(F)$ ,  $R_w(F^2)$  and the goodness of fit,  $S$ , are given below.<sup>8</sup> The data were checked for secondary extinction but no correction was necessary. Neutral atom scattering factors and values used to calculate the linear absorption coefficient are from the International Tables for X-ray Crystallography (1992).<sup>9</sup> All figures were generated using SHELXTL/PC.<sup>10</sup> Tables of positional and thermal parameters, bond lengths and angles, torsion angles and figures may be found from the Cambridge Crystallographic Centre by referencing CCDC number 2258328.

**Table S2.** Crystal data and structure refinement for **3**·Na<sup>+</sup>.

|                                   |                                             |                    |
|-----------------------------------|---------------------------------------------|--------------------|
| Empirical formula                 | C71.81 H93 Cl7 N4 Na O19                    |                    |
| Formula weight                    | 1587.30                                     |                    |
| Temperature                       | 100.03(12) K                                |                    |
| Wavelength                        | 1.54184 Å                                   |                    |
| Crystal system                    | triclinic                                   |                    |
| Space group                       | P -1                                        |                    |
| Unit cell dimensions              | a = 14.2739(3) Å                            | a = 110.4157(8)°.  |
|                                   | b = 15.65634(16) Å                          | b = 90.9004(15)°.  |
|                                   | c = 19.10054(13) Å                          | g = 103.4262(16)°. |
| Volume                            | 3869.11(10) Å <sup>3</sup>                  |                    |
| Z                                 | 2                                           |                    |
| Density (calculated)              | 1.362 Mg/m <sup>3</sup>                     |                    |
| Absorption coefficient            | 2.988 mm <sup>-1</sup>                      |                    |
| F(000)                            | 1668                                        |                    |
| Crystal size                      | 0.29 x 0.19 x 0.05 mm <sup>3</sup>          |                    |
| Theta range for data collection   | 2.482 to 77.374°.                           |                    |
| Index ranges                      | -18<=h<=18, -19<=k<=19, -23<=l<=23          |                    |
| Reflections collected             | 28080                                       |                    |
| Independent reflections           | 28080 [R(int) = ?]                          |                    |
| Completeness to theta = 67.684°   | 99.4 %                                      |                    |
| Absorption correction             | Semi-empirical from equivalents             |                    |
| Max. and min. transmission        | 1.00000 and 0.67027                         |                    |
| Refinement method                 | Full-matrix least-squares on F <sup>2</sup> |                    |
| Data / restraints / parameters    | 28080 / 1061 / 1150                         |                    |
| Goodness-of-fit on F <sup>2</sup> | 1.023                                       |                    |
| Final R indices [I>2sigma(I)]     | R1 = 0.0563, wR2 = 0.1506                   |                    |
| R indices (all data)              | R1 = 0.0593, wR2 = 0.1529                   |                    |
| Extinction coefficient            | n/a                                         |                    |
| Largest diff. peak and hole       | 0.668 and -0.692 e.Å <sup>-3</sup>          |                    |

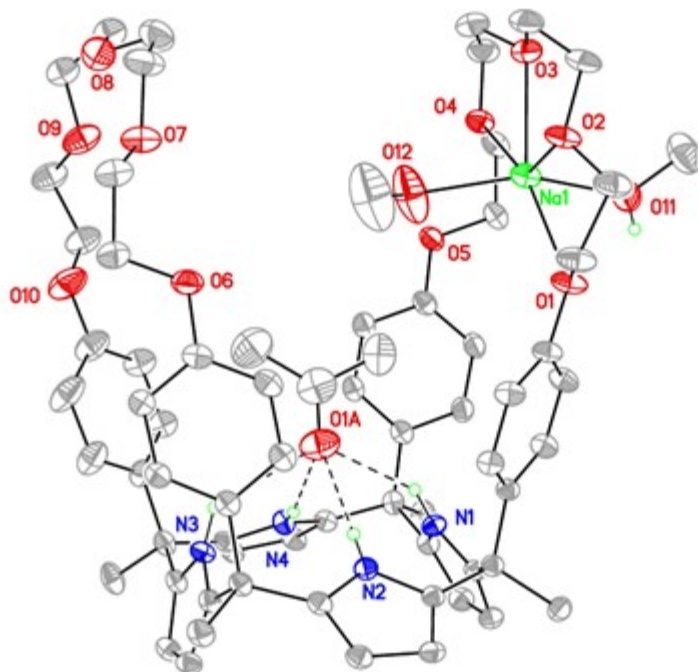

**Fig. S41** View of the Na<sup>+</sup> ion complex in **3** showing the heteroatom labeling scheme. Displacement ellipsoids are scaled to the 50% probability level. Dashed lines are indicative of a H-bonding interaction. Most H atoms were omitted for clarity.

## 5. References

1. P. Anzenbacher, K. Jursíková, V. M. Lynch, P. A. Gale, J. L. Sessler, *J. Am. Chem. Soc.*, 1999, **121**, 11020-11021.
2. J. Aguilera-Sigalat, C. S. de Pipaon, D. Hernandez-Alonso, E. C. J. R. Escudero-Adan, Galan-Mascaros, P. Ballester, *Cryst. Growth Des.*, 2017, **17**, 1328– 1338.
3. CrysAlisPro. Rigaku Oxford Diffraction, HyPix6000E System, CrysAlisPro Software System, 1.171.42.25a.
4. G. M. Sheldrick. *Acta Cryst.*, 2015, **A71**, 3-8.
5. G. M. Sheldrick, (2015). *Acta Cryst.*, 2015, **C71**, 3-8.
6. A. L. Spek, *Acta Cryst.*, 2009, **D65**, 148-155.
7. O. V. Dolomanov, L. J. Bourhis, R. J. Gildea, J. A. K. Howard, and H. Puschmann, *J. Appl. Cryst.*, 2009, **42**, 339-341.
8.  $R_w(F^2) = \{\sum w(|F_o|^2 - |F_c|^2)^2 / \sum w(|F_o|^4)\}^{1/2}$  where w is the weight given each reflection.  
 $R(F) = \sum (|F_o| - |F_c|) / \sum |F_o|$  for reflections with  $F_o > 4(\sigma(F_o))$ .  
 $S = [\sum w(|F_o|^2 - |F_c|^2)^2 / (n - p)]^{1/2}$ , where n is the number of reflections and p is the number of refined parameters.
9. International Tables for X-ray Crystallography (1992). Vol. C, Tables 4.2.6.8 and 6.1.1.4, A. J. C. Wilson, editor, Boston: Kluwer Academic Press.
10. Sheldrick, G. M. (1994). SHELXTL/PC (Version 5.03). Siemens Analytical X-ray Instruments, Inc., Madison, Wisconsin, USA.
